# Supplementary material for: Exposure to e-cigarette vapor extract induces vocal fold epithelial injury and triggers intense mucosal remodeling
Source: PubMed Central journal article supplement (PMC9438930; doi:10.1242/dmm.049476), 2022-08-23
Supplement: dmm-15-049476-s1.pdf [file dmm-15-049476-s1.pdf]

### Supplementary Figure S1

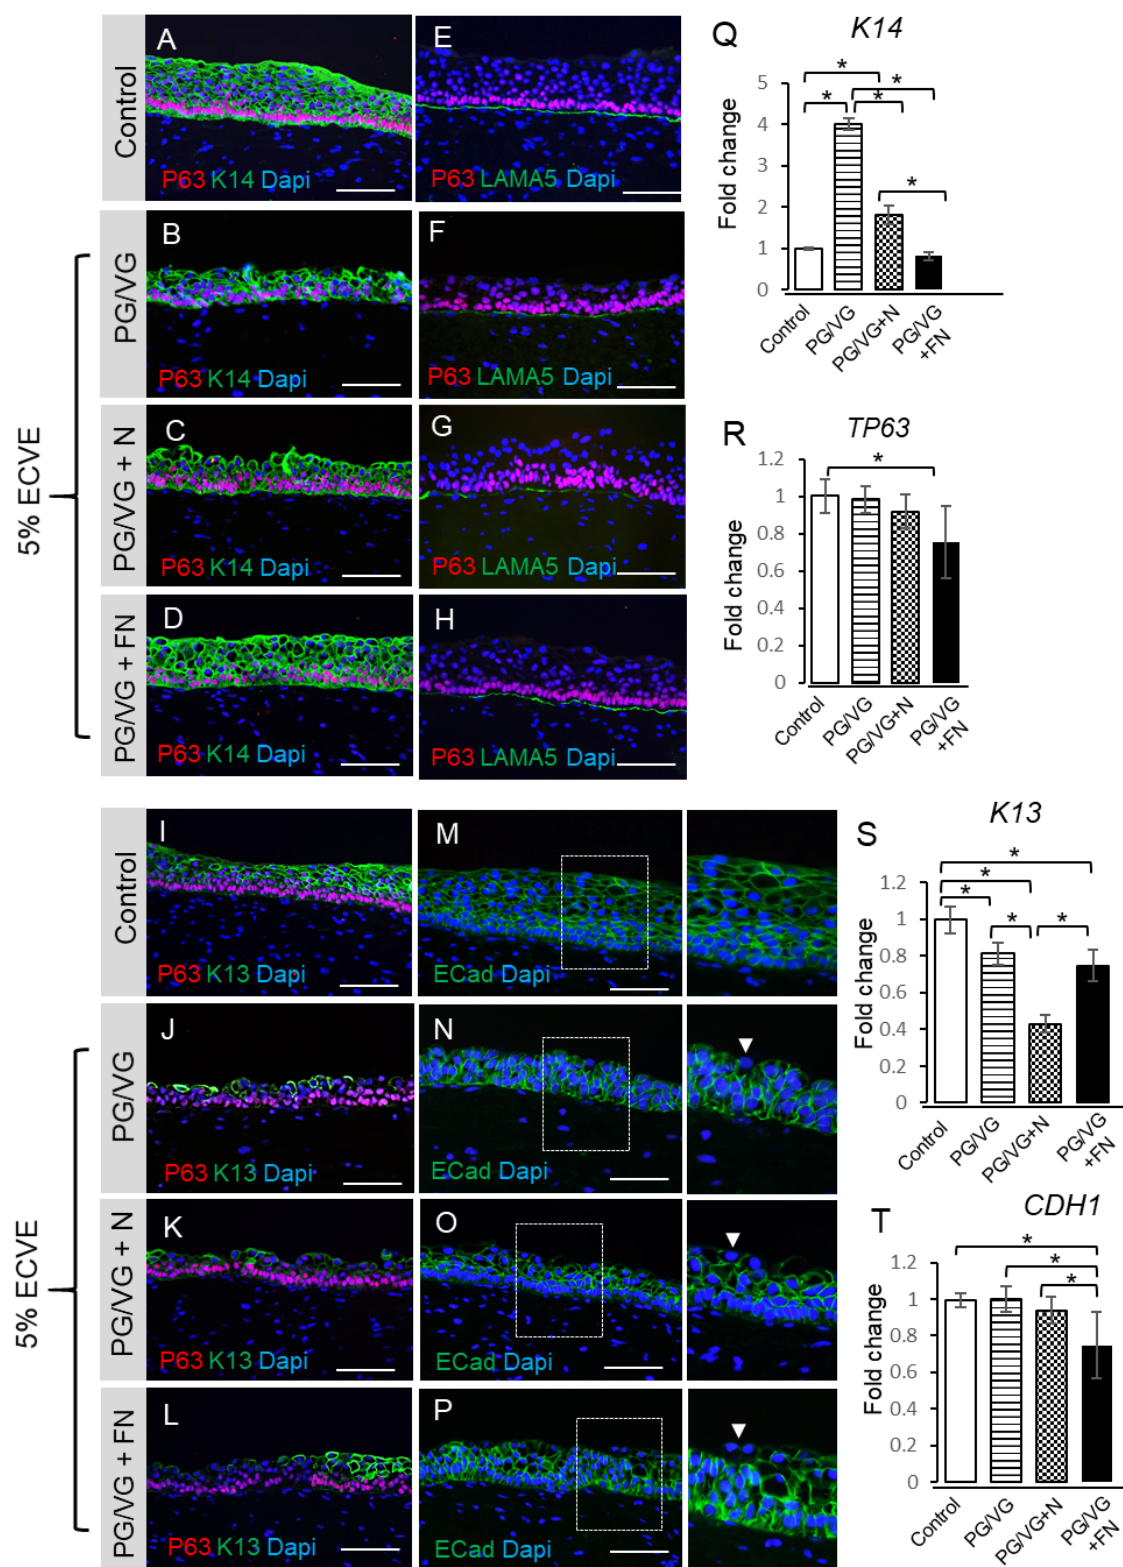

**Fig. S1. Distribution and expression levels of VF structural epithelial genes.** (A-D) Anti-Cytokeratin 14 (green) and anti-P63 staining (red) in control (A) and 5% ECVE exposed VF mucosae (B-D). (E-H) Anti-Laminin alfa 5 (green) co-stained with anti-P63 (red) in control (E) and 5% ECVE treated VF mucosae (F-H). (I-L) Anti-Cytokeratin 13 (in green) co-stained with anti-P63 (in red) in control (I) and 5% ECVE exposed VF mucosae (J-L). (M-P) Anti-E-Cadherin staining (in green) in control (M) and 5% ECVE exposed VF mucosae (N-P). Bracketed regions in the panels of M, N, O and P are magnified in the boxes on the right. White arrows point to apical cells with decreased expression of E-Cadherin. Scale bars = 100 $\mu$ m. (Q-T) Transcript levels of *KRT14* (Q), *TP63* (R), *KRT13* (S) and *CDH1* (T) in control and 5% ECVE exposed VF mucosae. Error bars represent  $\pm$  standard error of the mean obtained from three biological and three technical replicates. All histological data were performed in three biological replicates (n=3) and repeated twice in the laboratory by two investigators. One-Way ANOVA of variance for independent or correlated samples statistical analysis along with Plus Tukey HSD test were used to confirm statistical significance in gene expression, p-Value  $\leq$  0.05 (\*).

## Supplemental Figure S2

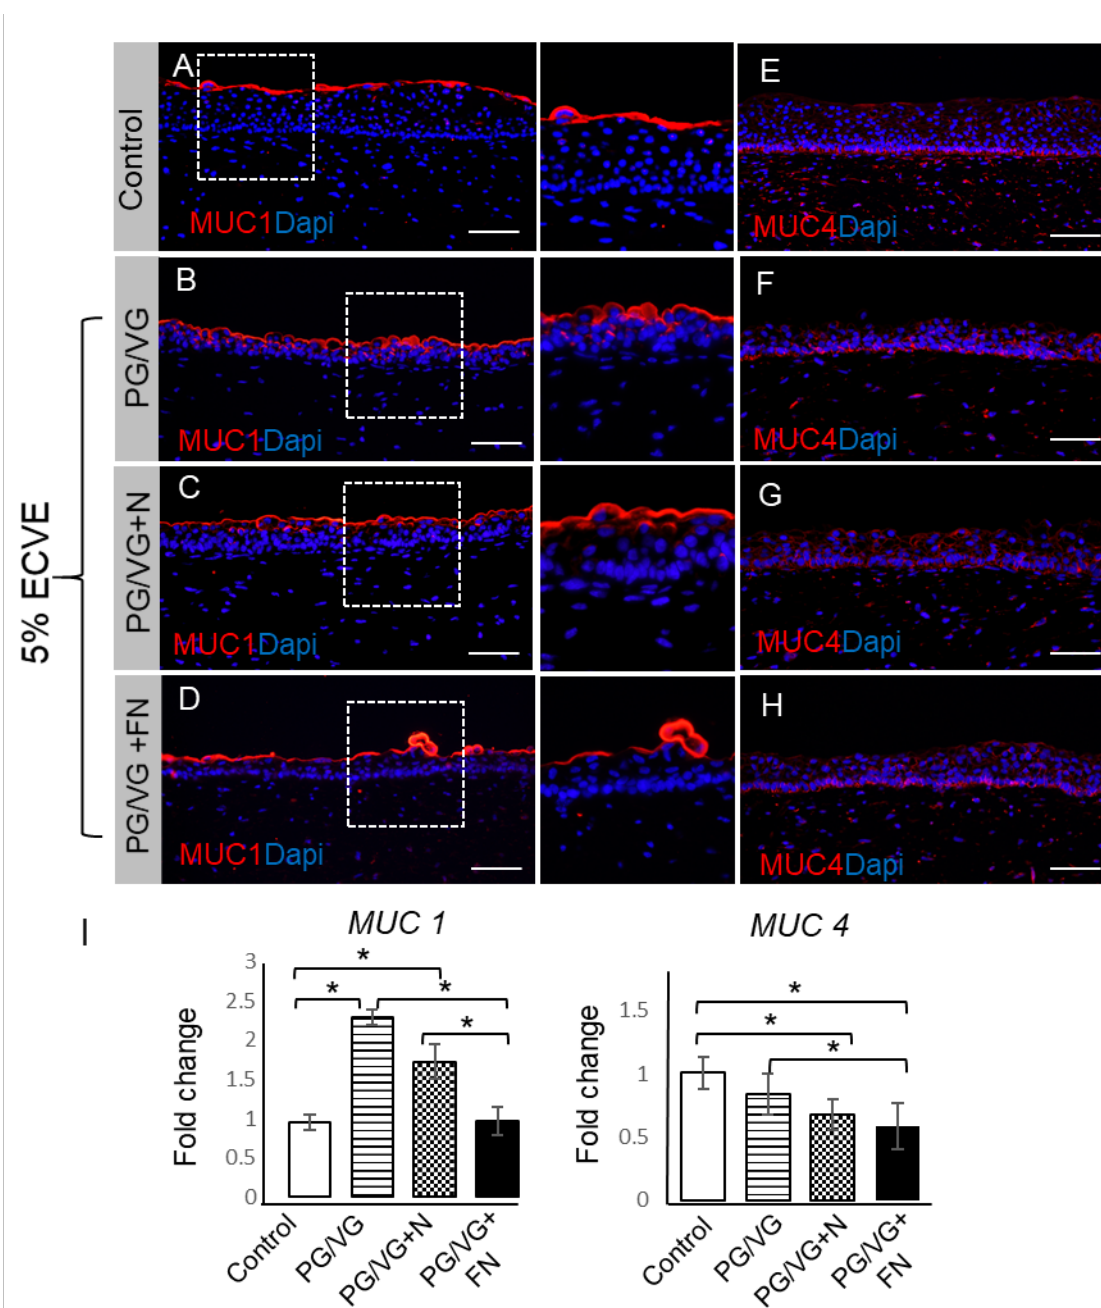

**Fig. S2. Distribution and expression levels of functional VF epithelial genes.** (A-D) Red immunofluorescent staining of Mucin 1 (MUC1) in control (A) and 5% ECVE exposed VF mucosae (B-D). Bracketed regions in the panels of A-D are magnified on the right respectively. (E-H) Red immunofluorescent staining of Mucin 4 (MUC4) in control (E) and 5% ECVE treated VF mucosae (F-H). Scale bar = 100 $\mu$ m. All histological data were performed in three biological replicates (n=3) and repeated twice in the laboratory by two investigators (I) Transcript levels of *MUC 1* and *MUC 4*. Error bars represent  $\pm$  standard error of the mean obtained from three biological and three technical replicates. One-Way ANOVA of variance for independent or correlated samples statistical analysis along with Plus Tukey HSD test were used to confirm statistical significance in gene expression, p-Value  $\leq$  0.05 (\*).

### Supplementary Figure S3

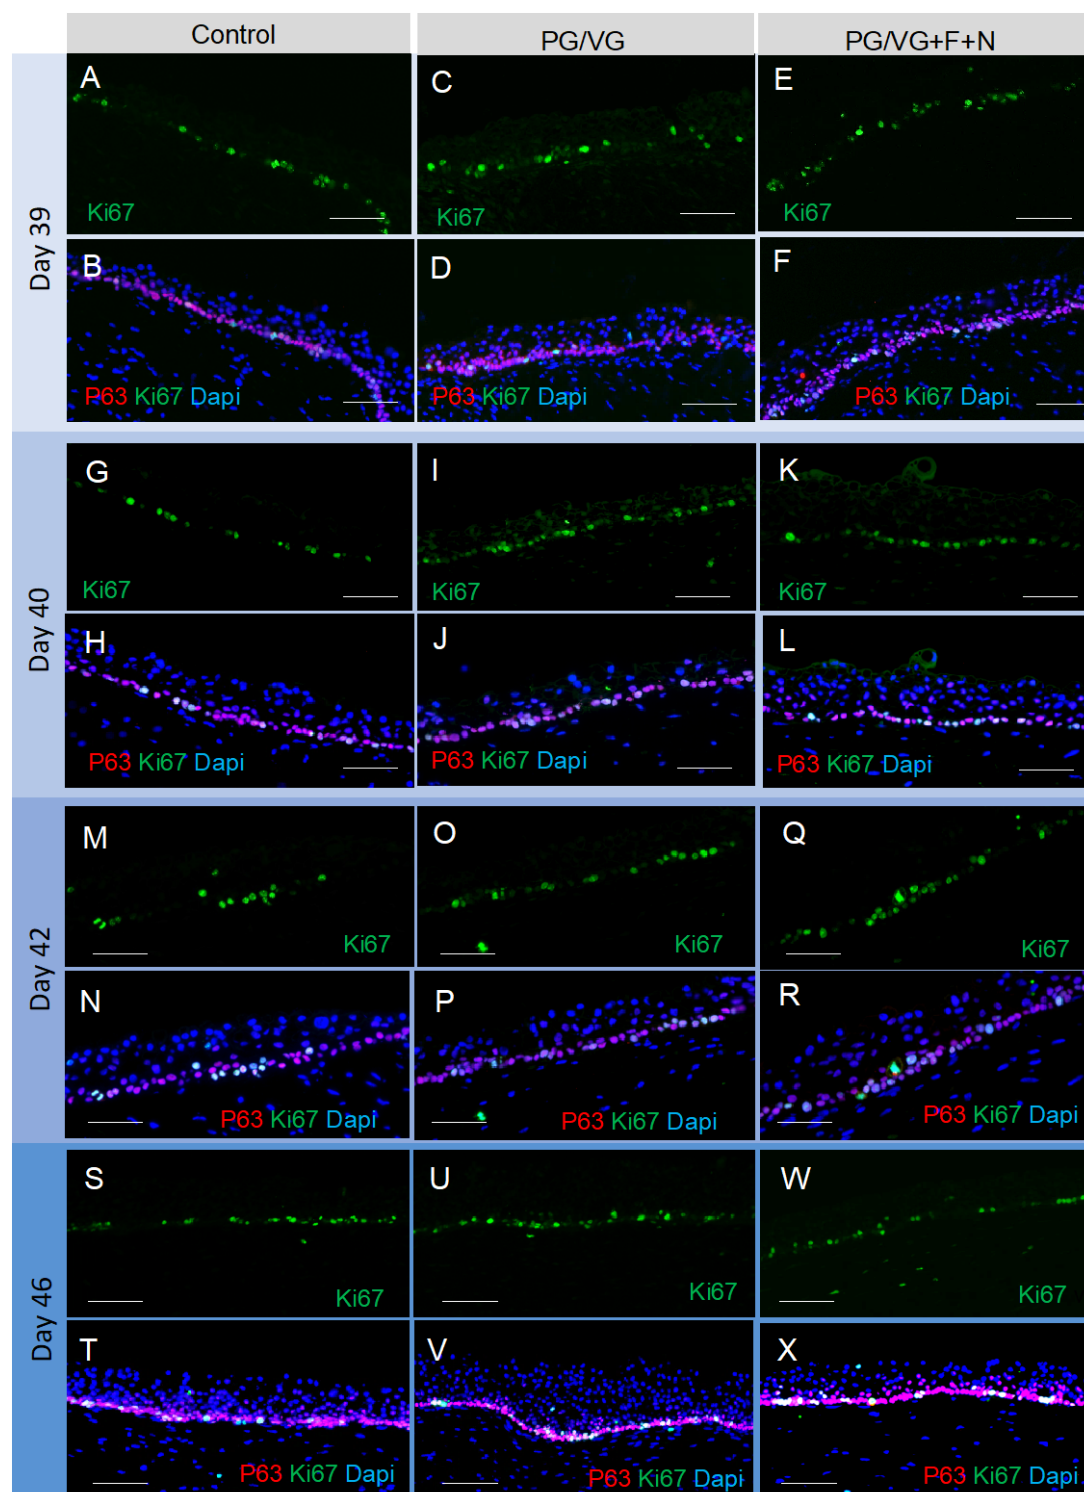

**Fig. S3. Assessment of cell proliferation in control and 0.5% ECVE exposed VF mucosae at different stages of VF epithelial recovery (A -X).** Anti-Ki67 staining (green) and anti-Ki67 co-stained with P63 (red) in control and 0.5% ECVE exposed VF mucosae at Day 39 (A-F), at Day 40 (G-L), at Day 42 (M-R), and at Day 46 (S-X). Scale bar = 100µm. All histological data were performed in three biological replicates (n=3) and repeated twice in the laboratory by two investigators

**Table S1.** Genes analyzed in the RT<sup>2</sup> Profiler PCR Arrays --Human Cytokine and Chemokines (PAHS-150Z).

| Position | RefSeq Number | Symbol        | Description                                                          |
|----------|---------------|---------------|----------------------------------------------------------------------|
| A01      | NM_004797     | <b>ADIPOQ</b> | Adiponectin, C1Q and collagen domain containing                      |
| A02      | NM_001200     | <b>BMP2</b>   | Bone morphogenetic protein 2                                         |
| A03      | NM_130851     | <b>BMP4</b>   | Bone morphogenetic protein 4                                         |
| A04      | NM_001718     | <b>BMP6</b>   | Bone morphogenetic protein 6                                         |
| A05      | NM_001719     | <b>BMP7</b>   | Bone morphogenetic protein 7                                         |
| A06      | NM_001735     | <b>C5</b>     | Complement component 5                                               |
| A07      | NM_002981     | <b>CCL1</b>   | Chemokine (C-C motif) ligand 1                                       |
| A08      | NM_002986     | <b>CCL11</b>  | Chemokine (C-C motif) ligand 11                                      |
| A09      | NM_005408     | <b>CCL13</b>  | Chemokine (C-C motif) ligand 13                                      |
| A10      | NM_002987     | <b>CCL17</b>  | Chemokine (C-C motif) ligand 17                                      |
| A11      | NM_002988     | <b>CCL18</b>  | Chemokine (C-C motif) ligand 18 (pulmonary and activation-regulated) |
| A12      | NM_006274     | <b>CCL19</b>  | Chemokine (C-C motif) ligand 19                                      |
| B01      | NM_002982     | <b>CCL2</b>   | Chemokine (C-C motif) ligand 2                                       |
| B02      | NM_004591     | <b>CCL20</b>  | Chemokine (C-C motif) ligand 20                                      |
| B03      | NM_002989     | <b>CCL21</b>  | Chemokine (C-C motif) ligand 21                                      |
| B04      | NM_002990     | <b>CCL22</b>  | Chemokine (C-C motif) ligand 22                                      |
| B05      | NM_002991     | <b>CCL24</b>  | Chemokine (C-C motif) ligand 24                                      |
| B06      | NM_002983     | <b>CCL3</b>   | Chemokine (C-C motif) ligand 3                                       |
| B07      | NM_002985     | <b>CCL5</b>   | Chemokine (C-C motif) ligand 5                                       |
| B08      | NM_006273     | <b>CCL7</b>   | Chemokine (C-C motif) ligand 7                                       |

|     |           |               |                                                                                                           |
|-----|-----------|---------------|-----------------------------------------------------------------------------------------------------------|
| B09 | NM_005623 | <b>CCL8</b>   | Chemokine (C-C motif) ligand 8                                                                            |
| B10 | NM_000074 | <b>CD40LG</b> | CD40 ligand                                                                                               |
| B11 | NM_000614 | <b>CNTF</b>   | Ciliary neurotrophic factor                                                                               |
| B12 | NM_000757 | <b>CSF1</b>   | Colony stimulating factor 1 (macrophage)                                                                  |
| C01 | NM_000758 | <b>CSF2</b>   | Colony stimulating factor 2 (granulocyte-macrophage)                                                      |
| C02 | NM_000759 | <b>CSF3</b>   | Colony stimulating factor 3 (granulocyte)                                                                 |
| C03 | NM_002996 | <b>CX3CL1</b> | Chemokine (C-X3-C motif) ligand 1                                                                         |
| C04 | NM_001511 | <b>CXCL1</b>  | Chemokine (C-X-C motif) ligand 1 (melanoma growth stimulating activity, alpha)                            |
| C05 | NM_001565 | <b>CXCL10</b> | Chemokine (C-X-C motif) ligand 10                                                                         |
| C06 | NM_005409 | <b>CXCL11</b> | Chemokine (C-X-C motif) ligand 11                                                                         |
| C07 | NM_000609 | <b>CXCL12</b> | Chemokine (C-X-C motif) ligand 12                                                                         |
| C08 | NM_006419 | <b>CXCL13</b> | Chemokine (C-X-C motif) ligand 13                                                                         |
| C09 | NM_022059 | <b>CXCL16</b> | Chemokine (C-X-C motif) ligand 16                                                                         |
| C10 | NM_002089 | <b>CXCL2</b>  | Chemokine (C-X-C motif) ligand 2                                                                          |
| C11 | NM_002994 | <b>CXCL5</b>  | Chemokine (C-X-C motif) ligand 5                                                                          |
| C12 | NM_002416 | <b>CXCL9</b>  | Chemokine (C-X-C motif) ligand 9                                                                          |
| D01 | NM_000639 | <b>FASLG</b>  | Fas ligand (TNF superfamily, member 6)                                                                    |
| D02 | NM_000175 | <b>GPI</b>    | Glucose-6-phosphate isomerase                                                                             |
| D03 | NM_000605 | <b>IFNA2</b>  | Interferon, alpha 2                                                                                       |
| D04 | NM_000619 | <b>IFNG</b>   | Interferon, gamma                                                                                         |
| D05 | NM_000572 | <b>IL10</b>   | Interleukin 10                                                                                            |
| D06 | NM_000641 | <b>IL11</b>   | Interleukin 11                                                                                            |
| D07 | NM_000882 | <b>IL12A</b>  | Interleukin 12A (natural killer cell stimulatory factor 1, cytotoxic lymphocyte maturation factor 1, p35) |
| D08 | NM_002187 | <b>IL12B</b>  | Interleukin 12B (natural killer cell stimulatory factor 2, cytotoxic lymphocyte maturation factor 2, p40) |

|     |           |              |                                                                          |
|-----|-----------|--------------|--------------------------------------------------------------------------|
| D09 | NM_002188 | <b>IL13</b>  | Interleukin 13                                                           |
| D10 | NM_000585 | <b>IL15</b>  | Interleukin 15                                                           |
| D11 | NM_004513 | <b>IL16</b>  | Interleukin 16                                                           |
| D12 | NM_002190 | <b>IL17A</b> | Interleukin 17A                                                          |
| E01 | NM_052872 | <b>IL17F</b> | Interleukin 17F                                                          |
| E02 | NM_001562 | <b>IL18</b>  | Interleukin 18 (interferon-gamma-inducing factor)                        |
| E03 | NM_000575 | <b>IL1A</b>  | Interleukin 1, alpha                                                     |
| E04 | NM_000576 | <b>IL1B</b>  | Interleukin 1, beta                                                      |
| E05 | NM_000577 | <b>IL1RN</b> | Interleukin 1 receptor antagonist                                        |
| E06 | NM_000586 | <b>IL2</b>   | Interleukin 2                                                            |
| E07 | NM_021803 | <b>IL21</b>  | Interleukin 21                                                           |
| E08 | NM_020525 | <b>IL22</b>  | Interleukin 22                                                           |
| E09 | NM_016584 | <b>IL23A</b> | Interleukin 23, alpha subunit p19                                        |
| E10 | NM_006850 | <b>IL24</b>  | Interleukin 24                                                           |
| E11 | NM_145659 | <b>IL27</b>  | Interleukin 27                                                           |
| E12 | NM_000588 | <b>IL3</b>   | Interleukin 3 (colony-stimulating factor, multiple)                      |
| F01 | NM_000589 | <b>IL4</b>   | Interleukin 4                                                            |
| F02 | NM_000879 | <b>IL5</b>   | Interleukin 5 (colony-stimulating factor, eosinophil)                    |
| F03 | NM_000600 | <b>IL6</b>   | Interleukin 6 (interferon, beta 2)                                       |
| F04 | NM_000880 | <b>IL7</b>   | Interleukin 7                                                            |
| F05 | NM_000584 | <b>CXCL8</b> | Interleukin 8                                                            |
| F06 | NM_000590 | <b>IL9</b>   | Interleukin 9                                                            |
| F07 | NM_002309 | <b>LIF</b>   | Leukemia inhibitory factor (cholinergic differentiation factor)          |
| F08 | NM_000595 | <b>LTA</b>   | Lymphotoxin alpha (TNF superfamily, member 1)                            |
| F09 | NM_002341 | <b>LTB</b>   | Lymphotoxin beta (TNF superfamily, member 3)                             |
| F10 | NM_002415 | <b>MIF</b>   | Macrophage migration inhibitory factor (glycosylation-inhibiting factor) |

|     |           |                  |                                                               |
|-----|-----------|------------------|---------------------------------------------------------------|
| F11 | NM_005259 | <b>MSTN</b>      | Myostatin                                                     |
| F12 | NM_018055 | <b>NODAL</b>     | Nodal homolog (mouse)                                         |
| G01 | NM_020530 | <b>OSM</b>       | Oncostatin M                                                  |
| G02 | NM_002704 | <b>PPBP</b>      | Pro-platelet basic protein (chemokine (C-X-C motif) ligand 7) |
| G03 | NM_000582 | <b>SPP1</b>      | Secreted phosphoprotein 1                                     |
| G04 | NM_003238 | <b>TGFB2</b>     | Transforming growth factor, beta 2                            |
| G05 | NM_000460 | <b>THPO</b>      | Thrombopoietin                                                |
| G06 | NM_000594 | <b>TNF</b>       | Tumor necrosis factor                                         |
| G07 | NM_002546 | <b>TNFRSF11B</b> | Tumor necrosis factor receptor superfamily, member 11b        |
| G08 | NM_003810 | <b>TNFSF10</b>   | Tumor necrosis factor (ligand) superfamily, member 10         |
| G09 | NM_003701 | <b>TNFSF11</b>   | Tumor necrosis factor (ligand) superfamily, member 11         |
| G10 | NM_006573 | <b>TNFSF13B</b>  | Tumor necrosis factor (ligand) superfamily, member 13b        |
| G11 | NM_003376 | <b>VEGFA</b>     | Vascular endothelial growth factor A                          |
| G12 | NM_002995 | <b>XCL1</b>      | Chemokine (C motif) ligand 1                                  |
| H01 | NM_001101 | <b>ACTB</b>      | Actin, beta                                                   |
| H02 | NM_004048 | <b>B2M</b>       | Beta-2-microglobulin                                          |
| H03 | NM_002046 | <b>GAPDH</b>     | Glyceraldehyde-3-phosphate dehydrogenase                      |
| H04 | NM_000194 | <b>HPRT1</b>     | Hypoxanthine phosphoribosyltransferase 1                      |
| H05 | NM_001002 | <b>RPLP0</b>     | Ribosomal protein, large, P0                                  |
| H06 | SA_00105  | <b>HGDC</b>      | Human Genomic DNA Contamination                               |
| H07 | SA_00104  | <b>RTC</b>       | Reverse Transcription Control                                 |
| H08 | SA_00104  | <b>RTC</b>       | Reverse Transcription Control                                 |
| H09 | SA_00104  | <b>RTC</b>       | Reverse Transcription Control                                 |
| H10 | SA_00103  | <b>PPC</b>       | Positive PCR Control                                          |
| H11 | SA_00103  | <b>PPC</b>       | Positive PCR Control                                          |
| H12 | SA_00103  | <b>PPC</b>       | Positive PCR Control                                          |



**Table S2.** List of CT values of human cytokines and chemokines uploaded on to the data analysis web portal at <http://www.qiagen.com/geneglobe>

|     | Control Group | Control Group | Control Group | PG/VG<br>Test Group 1 | PG/VG<br>Test Group 1 | PG/VG<br>Test Group 1 | PG/VG+N<br>Test Group 2 | PG/VG+N<br>Test Group 2 | PG/VG+N<br>Test Group 2 | PG/VG+N<br>Test Group 3 | PG/VG+N<br>Test Group 3 | PG/VG+N<br>Test Group 3 |
|-----|---------------|---------------|---------------|-----------------------|-----------------------|-----------------------|-------------------------|-------------------------|-------------------------|-------------------------|-------------------------|-------------------------|
| A01 | 34.69         | 35.26         | 33.19         | 32.75                 | 35.37                 | 33.31                 | 34.02                   | 34.20                   | 33.79                   | 34.18                   | 34.83                   | 34.92                   |
| A02 | 26.76         | 30.27         | 27.15         | 29.55                 | 29.60                 | 26.59                 | 27.40                   | 28.55                   | 27.19                   | 27.15                   | 29.63                   | 26.95                   |
| A03 | 27.22         | 28.81         | 27.23         | 25.69                 | 26.43                 | 23.47                 | 25.81                   | 28.06                   | 27.14                   | 26.52                   | 28.30                   | 26.62                   |
| A04 | 28.82         | 29.82         | 28.60         | 29.21                 | 28.57                 | 26.89                 | 26.97                   | 28.59                   | 28.68                   | 27.31                   | 28.92                   | 27.74                   |
| A05 | 28.90         | 28.23         | 26.85         | 26.13                 | 26.45                 | 24.38                 | 26.76                   | 28.28                   | 27.24                   | 28.05                   | 30.05                   | 28.34                   |
| A06 | 28.75         | 40            | 28.14         | 30.70                 | 40                    | 27.85                 | 27.24                   | 28.81                   | 29.23                   | 26.98                   | 28.71                   | 27.65                   |
| A07 | 30.55         | 40            | 32.39         | 30.43                 | 30.58                 | 29.29                 | 29.08                   | 30.20                   | 29.47                   | 28.94                   | 29.81                   | 29.82                   |
| A08 | 32.12         | 33.44         | 31.04         | 34.58                 | 31.63                 | 30.66                 | 27.92                   | 29.42                   | 29.51                   | 28.08                   | 30.06                   | 28.46                   |
| A09 | 31.70         | 31.66         | 30.35         | 30.38                 | 30.40                 | 29.59                 | 28.64                   | 30.60                   | 29.81                   | 29.84                   | 29.61                   | 29.07                   |
| A10 | 33.58         | 33.11         | 33.38         | 32.00                 | 34.11                 | 31.91                 | 33.22                   | 34.29                   | 32.55                   | 34.68                   | 33.79                   | 32.24                   |
| A11 | 32.61         | 30.82         | 32.93         | 31.83                 | 30.22                 | 31.36                 | 32.89                   | 29.98                   | 31.27                   | 33.59                   | 30.44                   | 33.80                   |
| A12 | 37.71         | 35.72         | 31.67         | 34.27                 | 32.71                 | 31.91                 | 33.47                   | 31.44                   | 35.16                   | 36.19                   | 31.72                   | 33.57                   |
| B01 | 26.31         | 27.03         | 25.41         | 24.86                 | 24.83                 | 23.13                 | 23.62                   | 25.97                   | 24.01                   | 24.33                   | 26.58                   | 24.55                   |
| B02 | 27.14         | 27.90         | 27.27         | 27.90                 | 27.18                 | 25.89                 | 26.11                   | 27.45                   | 26.32                   | 25.53                   | 26.29                   | 25.60                   |
| B03 | 31.60         | 33.37         | 32.96         | 34.65                 | 33.59                 | 32.41                 | 31.46                   | 31.89                   | 32.63                   | 32.38                   | 32.84                   | 31.81                   |
| B04 | 40            | 34.60         | 40            | 40                    | 36.92                 | 40                    | 35.05                   | 40                      | 40                      | 40                      | 40                      | 33.58                   |
| B05 | 34.80         | 33.22         | 34.10         | 33.26                 | 30.81                 | 32.57                 | 32.66                   | 35.59                   | 32.79                   | 33.09                   | 30.72                   | 32.94                   |
| B06 | 33.99         | 34.21         | 33.55         | 34.55                 | 33.68                 | 33.14                 | 32.85                   | 33.28                   | 32.68                   | 33.28                   | 33.19                   | 32.84                   |
| B07 | 32.49         | 32.86         | 31.82         | 32.85                 | 32.29                 | 31.36                 | 30.37                   | 31.93                   | 31.26                   | 32.18                   | 33.77                   | 32.77                   |
| B08 | 29.00         | 29.61         | 28.18         | 29.80                 | 30.20                 | 29.58                 | 26.61                   | 28.27                   | 27.60                   | 29.39                   | 27.14                   | 27.17                   |
| B09 | 35.71         | 35.74         | 35.50         | 34.23                 | 34.48                 | 32.28                 | 34.46                   | 33.74                   | 33.73                   | 33.68                   | 33.67                   | 35.51                   |
| B10 | 32.59         | 31.98         | 32.54         | 31.75                 | 32.06                 | 31.27                 | 31.28                   | 32.28                   | 31.50                   | 31.46                   | 32.41                   | 32.49                   |
| B11 | 29.36         | 29.38         | 29.13         | 29.48                 | 28.88                 | 27.94                 | 28.87                   | 29.16                   | 29.66                   | 30.49                   | 29.48                   | 29.47                   |
| B12 | 27.58         | 26.34         | 25.37         | 26.64                 | 26.29                 | 25.26                 | 25.02                   | 24.98                   | 25.14                   | 25.17                   | 25.30                   | 23.84                   |

|     |       |       |       |       |       |       |       |       |       |       |       |       |
|-----|-------|-------|-------|-------|-------|-------|-------|-------|-------|-------|-------|-------|
| C01 | 30.04 | 29.61 | 30.59 | 27.91 | 29.20 | 30.54 | 28.20 | 29.29 | 29.47 | 28.85 | 29.24 | 30.28 |
| C02 | 31.53 | 32.41 | 31.33 | 31.79 | 32.19 | 29.95 | 30.91 | 32.20 | 31.73 | 31.95 | 31.89 | 30.53 |
| C03 | 28.92 | 29.56 | 28.97 | 28.84 | 30.63 | 28.12 | 27.62 | 29.09 | 28.18 | 28.60 | 29.43 | 28.72 |
| C04 | 26.25 | 29.59 | 27.53 | 28.44 | 29.79 | 24.64 | 22.66 | 27.25 | 25.51 | 23.06 | 27.57 | 23.45 |
| C05 | 32.76 | 32.11 | 30.85 | 33.47 | 29.10 | 30.00 | 29.92 | 30.96 | 30.65 | 29.99 | 30.05 | 29.40 |
| C06 | 36.42 | 37.32 | 36.16 | 34.73 | 35.41 | 33.67 | 36.53 | 36.50 | 35.35 | 36.69 | 36.15 | 34.88 |
| C07 | 23.23 | 23.75 | 23.00 | 24.51 | 24.79 | 23.41 | 23.40 | 22.57 | 22.85 | 21.34 | 22.92 | 21.99 |
| C08 | 29.72 | 29.75 | 28.96 | 30.60 | 29.80 | 29.50 | 27.66 | 28.12 | 27.86 | 26.47 | 27.91 | 27.49 |
| C09 | 37.66 | 36.07 | 34.16 | 35.91 | 33.78 | 33.03 | 33.14 | 34.25 | 33.88 | 35.90 | 33.66 | 33.99 |
| C10 | 27.44 | 28.00 | 24.67 | 25.93 | 26.00 | 23.51 | 24.99 | 24.43 | 24.28 | 27.04 | 24.57 | 22.52 |
| C11 | 33.62 | 34.44 | 34.09 | 34.08 | 32.30 | 32.65 | 32.65 | 32.99 | 32.92 | 33.74 | 33.19 | 31.47 |
| C12 | 31.79 | 32.27 | 31.26 | 31.50 | 30.75 | 30.50 | 30.75 | 31.32 | 30.51 | 29.62 | 31.00 | 30.59 |
| D01 | 31.68 | 31.65 | 32.16 | 31.35 | 30.74 | 31.38 | 30.01 | 30.38 | 30.87 | 30.00 | 30.91 | 33.19 |
| D02 | 23.28 | 23.57 | 23.22 | 22.99 | 22.27 | 20.86 | 21.10 | 22.92 | 21.31 | 20.93 | 22.88 | 21.18 |
| D03 | 35.13 | 36.09 | 35.42 | 36.60 | 36.51 | 33.96 | 34.41 | 36.34 | 36.32 | 35.51 | 36.41 | 35.33 |
| D04 | 32.53 | 33.45 | 34.08 | 35.35 | 32.99 | 32.45 | 34.43 | 34.22 | 33.17 | 34.60 | 34.72 | 34.32 |
| D05 | 32.18 | 30.45 | 29.97 | 34.77 | 26.93 | 30.70 | 31.59 | 32.13 | 32.59 | 31.38 | 26.25 | 31.50 |
| D06 | 27.90 | 27.21 | 26.23 | 29.10 | 29.20 | 27.85 | 25.57 | 27.13 | 27.48 | 25.22 | 26.82 | 25.84 |
| D07 | 32.28 | 32.23 | 30.51 | 31.56 | 30.61 | 29.09 | 29.99 | 32.27 | 31.39 | 32.72 | 31.94 | 30.47 |
| D08 | 32.98 | 32.71 | 33.84 | 33.35 | 33.23 | 31.62 | 32.70 | 33.10 | 32.51 | 32.17 | 33.41 | 31.25 |
| D09 | 29.46 | 30.85 | 30.76 | 30.34 | 29.78 | 29.09 | 30.62 | 30.54 | 29.22 | 29.01 | 29.85 | 30.78 |
| D10 | 28.45 | 28.34 | 27.72 | 28.88 | 28.28 | 27.96 | 27.22 | 26.89 | 27.50 | 27.74 | 26.87 | 26.42 |
| D11 | 33.14 | 31.93 | 31.33 | 33.58 | 33.68 | 31.74 | 32.69 | 31.84 | 31.25 | 33.41 | 33.81 | 29.95 |
| D12 | 36.91 | 35.22 | 35.38 | 36.81 | 34.49 | 34.49 | 34.62 | 38.03 | 36.07 | 37.01 | 33.77 | 34.46 |
| E01 | 30.27 | 30.25 | 30.95 | 30.19 | 30.12 | 29.52 | 29.60 | 29.41 | 29.69 | 30.14 | 30.27 | 30.19 |
| E02 | 29.96 | 31.01 | 31.34 | 32.18 | 31.24 | 29.98 | 30.14 | 31.57 | 29.35 | 29.50 | 30.67 | 30.09 |
| E03 | 31.12 | 32.52 | 32.37 | 33.02 | 31.78 | 29.82 | 29.96 | 31.31 | 31.20 | 31.11 | 31.97 | 30.64 |
| E04 | 27.69 | 30.92 | 29.21 | 32.43 | 32.85 | 30.84 | 27.44 | 30.11 | 30.28 | 28.57 | 30.95 | 29.31 |
| E05 | 29.86 | 28.82 | 28.16 | 29.63 | 30.24 | 27.56 | 25.96 | 28.20 | 27.74 | 26.42 | 28.38 | 26.85 |
| E06 | 35.88 | 35.56 | 35.73 | 34.64 | 33.93 | 33.78 | 34.00 | 33.90 | 34.06 | 33.84 | 34.23 | 34.88 |
| E07 | 24.00 | 25.26 | 25.19 | 26.98 | 26.51 | 26.55 | 26.81 | 25.98 | 25.29 | 26.63 | 26.51 | 26.44 |
| E08 | 28.36 | 28.79 | 28.92 | 28.78 | 29.60 | 28.96 | 25.99 | 29.69 | 28.61 | 29.86 | 29.95 | 28.73 |
| E09 | 29.40 | 30.66 | 29.45 | 33.18 | 32.12 | 30.32 | 28.69 | 31.15 | 30.55 | 31.48 | 31.68 | 30.61 |
| E10 | 30.00 | 29.53 | 28.33 | 29.57 | 29.35 | 27.64 | 27.99 | 28.23 | 27.91 | 28.82 | 27.55 | 25.94 |

|     |       |       |       |       |       |       |       |       |       |       |       |        |
|-----|-------|-------|-------|-------|-------|-------|-------|-------|-------|-------|-------|--------|
| E11 | 31.80 | 31.83 | 31.39 | 32.06 | 31.32 | 29.78 | 30.74 | 31.02 | 30.13 | 31.27 | 31.38 | 30.59  |
| E12 | 34.25 | 29.91 | 32.65 | 33.99 | 28.34 | 30.18 | 32.31 | 27.56 | 32.11 | 33.62 | 25.98 | 31.14  |
| F01 | 29.45 | 30.53 | 30.19 | 29.00 | 31.35 | 30.66 | 29.92 | 30.81 | 30.07 | 29.87 | 30.83 | 30.27  |
| F02 | 32.76 | 34.80 | 34.81 | 32.64 | 34.19 | 33.44 | 32.34 | 33.41 | 33.10 | 32.41 | 34.69 | 34.51  |
| F03 | 23.57 | 23.94 | 23.02 | 23.71 | 23.80 | 22.13 | 19.99 | 21.60 | 21.41 | 19.59 | 21.01 | 19.87  |
| F04 | 32.75 | 34.61 | 35.17 | 33.74 | 34.10 | 34.61 | 33.92 | 36.58 | 33.90 | 34.04 | 36.51 | 33.50  |
| F05 | 24.58 | 24.33 | 22.83 | 23.90 | 24.71 | 22.33 | 20.48 | 23.06 | 22.69 | 20.56 | 23.09 | 20.86  |
| F06 | 35.65 | 36.91 | 35.37 | 37.16 | 36.05 | 34.95 | 34.30 | 38.13 | 36.37 | 34.37 | 37.45 | 35.98  |
| F07 | 29.33 | 28.44 | 26.67 | 29.57 | 28.78 | 26.71 | 24.88 | 27.65 | 27.37 | 28.76 | 26.97 | 26.00  |
| F08 | 32.08 | 33.27 | 32.46 | 34.49 | 31.77 | 31.00 | 32.72 | 32.45 | 31.69 | 31.99 | 32.42 | 31.32  |
| F09 | 32.38 | 32.49 | 31.81 | 32.09 | 32.39 | 30.21 | 31.85 | 32.58 | 31.14 | 32.33 | 32.77 | 31.46  |
| F10 | 22.40 | 21.56 | 20.25 | 20.82 | 21.02 | 19.83 | 21.19 | 21.57 | 20.50 | 20.57 | 19.90 | 19.57  |
| F11 | 32.24 | 32.78 | 31.74 | 31.92 | 32.14 | 29.95 | 31.90 | 32.32 | 31.05 | 31.55 | 32.29 | 31.74  |
| F12 | 33.28 | 33.83 | 31.82 | 33.39 | 32.83 | 30.64 | 31.70 | 32.14 | 31.68 | 34.11 | 33.56 | 30.82  |
| G01 | 32.62 | 32.32 | 33.60 | 33.20 | 33.76 | 31.20 | 31.31 | 30.99 | 31.82 | 31.84 | 31.19 | 33.61  |
| G02 | 30.70 | 32.92 | 31.90 | 34.04 | 33.29 | 32.93 | 32.93 | 31.32 | 34.35 | 30.91 | 29.23 | 30.97  |
| G03 | 25.93 | 26.61 | 25.82 | 27.17 | 27.15 | 25.97 | 24.33 | 25.92 | 25.89 | 27.63 | 27.35 | 26.62  |
| G04 | 26.16 | 26.86 | 26.10 | 25.75 | 25.46 | 23.84 | 23.96 | 25.50 | 26.00 | 24.15 | 26.02 | 24.90  |
| G05 | 30.20 | 31.47 | 30.63 | 31.25 | 30.85 | 29.55 | 29.82 | 30.83 | 30.61 | 29.37 | 31.17 | 29.14  |
| G06 | 40    | 35.58 | 34.07 | 10.58 | 34.42 | 40    | 35.52 | 40    | 38.63 | 33.45 | 32.87 | 33.30  |
| G07 | 28.38 | 29.40 | 26.67 | 28.71 | 31.66 | 25.89 | 22.30 | 27.14 | 26.61 | 25.96 | 26.76 | 24.13  |
| G08 | 31.23 | 30.44 | 30.00 | 29.30 | 29.52 | 28.40 | 28.29 | 30.82 | 29.78 | 29.46 | 30.85 | 30.11  |
| G09 | 32.88 | 31.61 | 31.41 | 31.34 | 31.28 | 29.63 | 30.51 | 31.95 | 31.44 | 31.72 | 32.50 | 31.33  |
| G10 | 28.63 | 27.84 | 27.61 | 29.38 | 28.89 | 27.88 | 27.64 | 27.17 | 27.62 | 28.26 | 27.31 | 26.59  |
| G11 | 24.36 | 24.46 | 23.44 | 25.53 | 23.13 | 22.22 | 24.36 | 24.19 | 23.83 | 24.19 | 23.21 | 22.33  |
| G12 | 35.76 | 35.57 | 35.57 | 37.72 | 31.79 | 31.78 | 37.69 | 32.51 | 36.57 | 38.26 | 31.15 | 32.88  |
| H01 | 20.61 | 23.63 | 20.89 | 21.00 | 22.56 | 17.22 | 18.59 | 22.03 | 19.25 | 19.56 | 22.22 | 19.52  |
| H02 | 20.60 | 22.05 | 20.97 | 21.73 | 21.13 | 20.09 | 17.46 | 20.20 | 18.46 | 18.33 | 20.24 | 18.79  |
| H03 | 20.37 | 22.68 | 20.18 | 21.63 | 19.69 | 19.69 | 19.13 | 19.86 | 21.15 | 19.50 | 19.79 | 19.50  |
| H04 | 26.30 | 26.68 | 25.93 | 26.23 | 25.80 | 25.16 | 24.96 | 26.13 | 26.35 | 25.25 | 26.14 | 25.32  |
| H05 | 22.68 | 21.40 | 20.23 | 19.92 | 19.64 | 18.31 | 16.57 | 19.10 | 20.49 | 17.44 | 19.49 | 17.63  |
| H06 | 35.22 | 35.67 | 36.41 | 34.31 | 34.93 | 34.44 | 35.26 | 35.75 | 35.50 | 35.17 | 35.68 | 34.62  |
| H07 | 22.40 | 23.64 | 23.88 | 23.71 | 25.29 | 23.19 | 21.12 | 25.39 | 26.30 | 21.13 | 24.90 | 22.89  |
| H08 | 22.50 | 23.83 | 24.00 | 24.51 | 25.68 | 22.81 | 21.40 | 25.11 | 25.96 | 21.22 | 24.80 | 22.732 |

|     |       |       |       |       |       |       |       |       |       |       |       |       |
|-----|-------|-------|-------|-------|-------|-------|-------|-------|-------|-------|-------|-------|
| H09 | 22.59 | 23.77 | 23.65 | 24.38 | 25.36 | 22.84 | 25.84 | 24.87 | 23.68 | 26.77 | 25.12 | 22.97 |
| H10 | 27.66 | 23.23 | 27.91 | 27.13 | 23.89 | 25.71 | 28.59 | 23.52 | 26.43 | 28.30 | 22.87 | 24.21 |
| H11 | 28.17 | 23.90 | 27.31 | 28.16 | 22.66 | 23.92 | 29.17 | 24.15 | 25.87 | 27.64 | 22.27 | 23.71 |
| H12 | 28.80 | 22.92 | 27.84 | 27.73 | 23.81 | 24.25 | 29.33 | 23.82 | 26.68 | 28.15 | 22.17 | 23.90 |

**Table S3.** Fold regulation and p-values of genes associated mucosal inflammation. Fold regulation is compared to controls

| Position | Gene Symbol   | Group 1         |          | Group 2         |          | Group 3         |          |
|----------|---------------|-----------------|----------|-----------------|----------|-----------------|----------|
|          |               | Fold Regulation | p-Value  | Fold Regulation | p-Value  | Fold Regulation | p-Value  |
| A01      | <b>ADIPOQ</b> | -1.34           | 0.949612 | -2.65           | 0.07756  | -4.34           | 0.022261 |
| A02      | <b>BMP2</b>   | -2.93           | 0.162542 | -2.56           | 0.214097 | -3.07           | 0.150726 |
| A03      | <b>BMP4</b>   | 2.89            | 0.048146 | -1.93           | 0.019491 | -2.22           | 0.007207 |
| A04      | <b>BMP6</b>   | -1.13           | 0.333216 | -1.62           | 0.024908 | -1.6            | 0.015384 |
| A05      | <b>BMP7</b>   | 2.49            | 0.044874 | -2.19           | 0.15756  | -5.99           | 0.051444 |
| A06      | <b>C5</b>     | -2.99           | 0.26999  | 1.42            | 0.521938 | 2.12            | 0.946686 |
| A07      | <b>CCL1</b>   | 2.87            | 0.296137 | 2.57            | 0.391479 | 2.56            | 0.40323  |
| A08      | <b>CCL11</b>  | -2.17           | 0.211494 | 2.93            | 0.009991 | 2.97            | 0.003055 |
| A09      | <b>CCL13</b>  | 1.06            | 0.855139 | -1.1            | 0.634625 | -1              | 0.89173  |
| A10      | <b>CCL17</b>  | -1.27           | 0.847791 | -3.24           | 0.228373 | -3.95           | 0.188997 |
| A11      | <b>CCL18</b>  | -1.03           | 0.717673 | -1.94           | 0.633077 | -4.78           | 0.471747 |
| A12      | <b>CCL19</b>  | -1.08           | 0.653829 | -2.16           | 0.832994 | -2.47           | 0.749384 |
| B01      | <b>CCL2</b>   | 1.93            | 0.005131 | 1.01            | 0.765233 | -1.59           | 0.049993 |
| B02      | <b>CCL20</b>  | -1.49           | 0.161355 | -1.85           | 0.180155 | -1.1            | 0.733896 |
| B03      | <b>CCL21</b>  | -3.81           | 0.076845 | -2.06           | 0.224412 | -2.76           | 0.11197  |
| B04      | <b>CCL22</b>  | -2.23           | 0.29771  | -3.56           | 0.192872 | -2.69           | 0.229169 |
| B05      | <b>CCL24</b>  | 1.74            | 0.560675 | -2.2            | 0.38765  | 1.02            | 0.733473 |
| B06      | <b>CCL3</b>   | -1.87           | 0.158638 | -1.65           | 0.368825 | -1.93           | 0.216966 |
| B07      | <b>CCL5</b>   | -1.75           | 0.090679 | -1.41           | 0.254146 | -4.87           | 0.010946 |
| B08      | <b>CCL7</b>   | -3.88           | 0.008    | -1.2            | 0.425252 | -1.66           | 0.946204 |
| B09      | <b>CCL8</b>   | 1.24            | 0.778056 | -1.6            | 0.610014 | -1.85           | 0.510117 |
| B10      | <b>CD40LG</b> | -1.28           | 0.57854  | -2.02           | 0.329164 | -2.86           | 0.238628 |
| B11      | <b>CNTF</b>   | -1.41           | 0.364815 | -3.11           | 0.121358 | -4.88           | 0.090452 |
| B12      | <b>CSF1</b>   | -1.57           | 0.295875 | -1.24           | 0.661535 | -1.08           | 0.72296  |
| C01      | <b>CSF2</b>   | -1.12           | 0.769752 | -1.52           | 0.413178 | -2.21           | 0.358839 |
| C02      | <b>CSF3</b>   | -1.5            | 0.0961   | -2.94           | 0.007822 | -2.76           | 0.021024 |
| C03      | <b>CX3CL1</b> | -2.11           | 0.219691 | -1.8            | 0.153513 | -2.89           | 0.038237 |
| C04      | <b>CXCL1</b>  | -1.82           | 0.646625 | 1.93            | 0.39189  | 2.51            | 0.224539 |

|     |               |        |          |       |          |        |          |
|-----|---------------|--------|----------|-------|----------|--------|----------|
| C05 | <b>CXCL10</b> | 1.02   | 0.615737 | -1.23 | 0.522227 | 1.25   | 0.685628 |
| C06 | <b>CXCL11</b> | -1.41  | 0.413821 | -3.25 | 0.14523  | -3.31  | 0.134927 |
| C07 | <b>CXCL12</b> | -3.83  | 0.02162  | -2.49 | 0.18512  | -1.44  | 0.200292 |
| C08 | <b>CXCL13</b> | -2.86  | 0.074479 | -1.07 | 0.980486 | 1.34   | 0.426084 |
| C09 | <b>CXCL16</b> | -1.18  | 0.626293 | -1.67 | 0.221699 | -2.4   | 0.319296 |
| C10 | <b>CXCL2</b>  | 1.44   | 0.761869 | 1.35  | 0.610594 | 1.17   | 0.492224 |
| C11 | <b>CXCL5</b>  | 1.01   | 0.81883  | -1.42 | 0.487189 | -1.43  | 0.658705 |
| C12 | <b>CXCL9</b>  | -1.13  | 0.838286 | -1.72 | 0.288454 | -1.31  | 0.369544 |
| D01 | <b>FASLG</b>  | -1.28  | 0.71466  | -1.22 | 0.660594 | -2.46  | 0.386366 |
| D02 | <b>GPI</b>    | 1.22   | 0.645905 | -1.08 | 0.946249 | -1.05  | 0.721945 |
| D03 | <b>IFNA2</b>  | -1.6   | 0.316888 | -2.84 | 0.149693 | -3.4   | 0.133243 |
| D04 | <b>IFNG</b>   | -2.22  | 0.203707 | -4.87 | 0.106166 | -7.76  | 0.068464 |
| D05 | <b>IL10</b>   | -1.95  | 0.562303 | -7.67 | 0.137885 | -1.53  | 0.501363 |
| D06 | <b>IL11</b>   | -6.18  | 0.062115 | -2.48 | 0.13037  | -1.53  | 0.280914 |
| D07 | <b>IL12A</b>  | 1.17   | 0.723315 | -2.36 | 0.071131 | -3.48  | 0.071281 |
| D08 | <b>IL12B</b>  | -1.5   | 0.380721 | -2.45 | 0.284113 | -1.82  | 0.332568 |
| D09 | <b>IL13</b>   | -1.33  | 0.399013 | -2.76 | 0.212357 | -2.44  | 0.181454 |
| D10 | <b>IL15</b>   | -2.34  | 0.136928 | -1.66 | 0.493474 | -1.52  | 0.603639 |
| D11 | <b>IL16</b>   | -3.72  | 0.139453 | -2.81 | 0.272895 | -4.06  | 0.244233 |
| D12 | <b>IL17A</b>  | -1.61  | 0.392563 | -2.97 | 0.147803 | -2.26  | 0.414697 |
| E01 | <b>IL17F</b>  | -1.4   | 0.462483 | -1.71 | 0.43161  | -2.77  | 0.209698 |
| E02 | <b>IL18</b>   | -2.62  | 0.111179 | -2.43 | 0.273233 | -2.11  | 0.153393 |
| E03 | <b>IL1A</b>   | -1.47  | 0.328236 | -1.43 | 0.303056 | -2     | 0.144028 |
| E04 | <b>IL1B</b>   | -13.84 | 0.135316 | -3.26 | 0.214877 | -4.29  | 0.184107 |
| E05 | <b>IL1RN</b>  | -2.34  | 0.19862  | -1.04 | 0.648971 | -1.03  | 0.673274 |
| E06 | <b>IL2</b>    | -1.11  | 0.78615  | -1.61 | 0.473853 | -2.12  | 0.285518 |
| E07 | <b>IL21</b>   | -7.39  | 0.041969 | -7.5  | 0.050909 | -11.12 | 0.035929 |
| E08 | <b>IL22</b>   | -2.73  | 0.169701 | -2.15 | 0.199245 | -6.02  | 0.062789 |
| E09 | <b>IL23A</b>  | -8.35  | 0.001218 | -3.98 | 0.002164 | -9.1   | 0.001272 |
| E10 | <b>IL24</b>   | -1.51  | 0.238463 | -1.37 | 0.578921 | 1.06   | 0.614469 |
| E11 | <b>IL27</b>   | -1.33  | 0.380075 | -1.57 | 0.533096 | -2.25  | 0.15919  |
| E12 | <b>IL3</b>    | 1.33   | 0.95802  | -1.06 | 0.815109 | 1.2    | 0.484133 |
| F01 | <b>IL4</b>    | -2.48  | 0.566347 | -3.77 | 0.046445 | -4.1   | 0.035901 |

|     |                  |        |          |       |          |       |          |
|-----|------------------|--------|----------|-------|----------|-------|----------|
| F02 | <b>IL5</b>       | -1.26  | 0.866017 | -1.44 | 0.388842 | -2.85 | 0.189438 |
| F03 | <b>IL6</b>       | -1.66  | 0.108928 | 1.75  | 0.049729 | 3.01  | 0.001628 |
| F04 | <b>IL7</b>       | -2.08  | 0.337616 | -3.61 | 0.146737 | -3.55 | 0.134236 |
| F05 | <b>CXCL8</b>     | -1.69  | 0.20717  | 1.1   | 0.942692 | 1.57  | 0.262679 |
| F06 | <b>IL9</b>       | -2.01  | 0.281961 | -2.77 | 0.1509   | -2.94 | 0.14391  |
| F07 | <b>LIF</b>       | -2.35  | 0.144571 | -1.14 | 0.521211 | -1.82 | 0.501239 |
| F08 | <b>LTA</b>       | -1.79  | 0.352771 | -2.61 | 0.128913 | -2.1  | 0.06198  |
| F09 | <b>LTB</b>       | -1.28  | 0.403547 | -2.51 | 0.184707 | -3.31 | 0.055584 |
| F10 | <b>MIF</b>       | -1.13  | 0.592163 | -2.6  | 0.184788 | -1.3  | 0.683908 |
| F11 | <b>MSTN</b>      | -1.08  | 0.686789 | -2.3  | 0.180819 | -2.59 | 0.024663 |
| F12 | <b>NODAL</b>     | -1.26  | 0.392322 | -1.47 | 0.451274 | -3.06 | 0.1661   |
| G01 | <b>OSM</b>       | -1.87  | 0.323128 | -1.17 | 0.740635 | -2.19 | 0.552686 |
| G02 | <b>PPBP</b>      | -6.1   | 0.0713   | -6.65 | 0.144067 | -1.23 | 0.78631  |
| G03 | <b>SPP1</b>      | -3.18  | 0.019935 | -1.94 | 0.054915 | -7.17 | 0.009913 |
| G04 | <b>TGFB2</b>     | 1.26   | 0.291319 | -1.39 | 0.263056 | -1.33 | 0.261376 |
| G05 | <b>THPO</b>      | -1.75  | 0.070771 | -2.54 | 0.037897 | -1.85 | 0.06717  |
| G06 | <b>TNF</b>       | 127.49 | 0.373901 | -4.02 | 0.050591 | -1.22 | 0.969815 |
| G07 | <b>TNFRSF11B</b> | -3.09  | 0.268953 | 2.14  | 0.359668 | 1.7   | 0.344565 |
| G08 | <b>TNFSF10</b>   | 1.37   | 0.659453 | -1.71 | 0.292383 | -2.54 | 0.176298 |
| G09 | <b>TNFSF11</b>   | 1.14   | 0.847909 | -2.05 | 0.280084 | -3.14 | 0.196984 |
| G10 | <b>TNFSF13B</b>  | -3.29  | 0.158789 | -2.22 | 0.331585 | -2.18 | 0.332172 |
| G11 | <b>VEGFA</b>     | -1.48  | 0.522086 | -3.33 | 0.065147 | -1.89 | 0.334883 |
| G12 | <b>XCL1</b>      | 2.17   | 0.328343 | -1.83 | 0.947324 | 1.17  | 0.480846 |
| H01 | <b>ACTB</b>      | 1.34   | 0.498357 | 1.04  | 0.823407 | -1.4  | 0.424168 |
| H02 | <b>B2M</b>       | -1.74  | 0.069622 | 1.75  | 0.198236 | 1.25  | 0.304749 |
| H03 | <b>GAPDH</b>     | -1.22  | 0.842034 | -1.59 | 0.393738 | -1.22 | 0.668975 |
| H04 | <b>HPRT1</b>     | -1.37  | 0.36067  | -2.31 | 0.067216 | -2.04 | 0.08229  |
| H05 | <b>RPLP0</b>     | 2.17   | 0.136325 | 2.02  | 0.292426 | 2.79  | 0.046283 |

**Table S4.** Table of genes involved in the Fatty Acid Metabolism (PAHS-007Z).

| Position | RefSeq Number | Symbol        | Description                                        |
|----------|---------------|---------------|----------------------------------------------------|
| A01      | NM_001607     | <b>ACAA1</b>  | Acetyl-CoA acyltransferase 1                       |
| A02      | NM_006111     | <b>ACAA2</b>  | Acetyl-CoA acyltransferase 2                       |
| A03      | NM_025247     | <b>ACAD10</b> | Acyl-CoA dehydrogenase family, member 10           |
| A04      | NM_032169     | <b>ACAD11</b> | Acyl-CoA dehydrogenase family, member 11           |
| A05      | NM_014049     | <b>ACAD9</b>  | Acyl-CoA dehydrogenase family, member 9            |
| A06      | NM_001608     | <b>ACADL</b>  | Acyl-CoA dehydrogenase, long chain                 |
| A07      | NM_000016     | <b>ACADM</b>  | Acyl-CoA dehydrogenase, C-4 to C-12 straight chain |
| A08      | NM_000017     | <b>ACADS</b>  | Acyl-CoA dehydrogenase, C-2 to C-3 short chain     |
| A09      | NM_001609     | <b>ACADSB</b> | Acyl-CoA dehydrogenase, short/branched chain       |
| A10      | NM_000018     | <b>ACADVL</b> | Acyl-CoA dehydrogenase, very long chain            |
| A11      | NM_000019     | <b>ACAT1</b>  | Acetyl-CoA acetyltransferase 1                     |
| A12      | NM_005891     | <b>ACAT2</b>  | Acetyl-CoA acetyltransferase 2                     |
| B01      | NM_001037161  | <b>ACOT1</b>  | Acyl-CoA thioesterase 1                            |
| B02      | NM_130767     | <b>ACOT12</b> | Acyl-CoA thioesterase 12                           |
| B03      | NM_001037162  | <b>ACOT6</b>  | Acyl-CoA thioesterase 6                            |
| B04      | NM_181866     | <b>ACOT7</b>  | Acyl-CoA thioesterase 7                            |
| B05      | NM_005469     | <b>ACOT8</b>  | Acyl-CoA thioesterase 8                            |
| B06      | NM_001033583  | <b>ACOT9</b>  | Acyl-CoA thioesterase 9                            |
| B07      | NM_004035     | <b>ACOX1</b>  | Acyl-CoA oxidase 1, palmitoyl                      |
| B08      | NM_003500     | <b>ACOX2</b>  | Acyl-CoA oxidase 2, branched chain                 |
| B09      | NM_003501     | <b>ACOX3</b>  | Acyl-CoA oxidase 3, pristanoyl                     |
| B10      | NM_015162     | <b>ACSBG1</b> | Acyl-CoA synthetase bubblegum family member 1      |
| B11      | NM_030924     | <b>ACSBG2</b> | Acyl-CoA synthetase bubblegum family member 2      |
| B12      | NM_001995     | <b>ACSL1</b>  | Acyl-CoA synthetase long-chain family member 1     |
| C01      | NM_004457     | <b>ACSL3</b>  | Acyl-CoA synthetase long-chain family member 3     |
| C02      | NM_004458     | <b>ACSL4</b>  | Acyl-CoA synthetase long-chain family member 4     |



|     |              |               |                                                                                   |
|-----|--------------|---------------|-----------------------------------------------------------------------------------|
| C03 | NM_016234    | <b>ACSL5</b>  | Acyl-CoA synthetase long-chain family member 5                                    |
| C04 | NM_001009185 | <b>ACSL6</b>  | Acyl-CoA synthetase long-chain family member 6                                    |
| C05 | NM_005622    | <b>ACSM3</b>  | Acyl-CoA synthetase medium-chain family member 3                                  |
| C06 | NM_001080454 | <b>ACSM4</b>  | Acyl-CoA synthetase medium-chain family member 4                                  |
| C07 | NM_017888    | <b>ACSM5</b>  | Acyl-CoA synthetase medium-chain family member 5                                  |
| C08 | NM_000690    | <b>ALDH2</b>  | Aldehyde dehydrogenase 2 family (mitochondrial)                                   |
| C09 | NM_004051    | <b>BDH1</b>   | 3-hydroxybutyrate dehydrogenase, type 1                                           |
| C10 | NM_020139    | <b>BDH2</b>   | 3-hydroxybutyrate dehydrogenase, type 2                                           |
| C11 | NM_001876    | <b>CPT1A</b>  | Carnitine palmitoyltransferase 1A (liver)                                         |
| C12 | NM_004377    | <b>CPT1B</b>  | Carnitine palmitoyltransferase 1B (muscle)                                        |
| D01 | NM_152359    | <b>CPT1C</b>  | Carnitine palmitoyltransferase 1C                                                 |
| D02 | NM_000098    | <b>CPT2</b>   | Carnitine palmitoyltransferase 2                                                  |
| D03 | NM_000755    | <b>CRAT</b>   | Carnitine O-acetyltransferase                                                     |
| D04 | NM_021151    | <b>CROT</b>   | Carnitine O-octanoyltransferase                                                   |
| D05 | NM_001359    | <b>DECR1</b>  | 2,4-dienoyl CoA reductase 1, mitochondrial                                        |
| D06 | NM_020664    | <b>DECR2</b>  | 2,4-dienoyl CoA reductase 2, peroxisomal                                          |
| D07 | NM_004092    | <b>ECHS1</b>  | Enoyl CoA hydratase, short chain, 1, mitochondrial                                |
| D08 | NM_006117    | <b>ECI2</b>   | Enoyl-CoA delta isomerase 2                                                       |
| D09 | NM_001966    | <b>EHHADH</b> | Enoyl-CoA, hydratase/3-hydroxyacyl CoA dehydrogenase                              |
| D10 | NM_001443    | <b>FABP1</b>  | Fatty acid binding protein 1, liver                                               |
| D11 | NM_000134    | <b>FABP2</b>  | Fatty acid binding protein 2, intestinal                                          |
| D12 | NM_004102    | <b>FABP3</b>  | Fatty acid binding protein 3, muscle and heart (mammary-derived growth inhibitor) |
| E01 | NM_001442    | <b>FABP4</b>  | Fatty acid binding protein 4, adipocyte                                           |
| E02 | NM_001444    | <b>FABP5</b>  | Fatty acid binding protein 5 (psoriasis-associated)                               |
| E03 | NM_001445    | <b>FABP6</b>  | Fatty acid binding protein 6, ileal                                               |
| E04 | NM_001446    | <b>FABP7</b>  | Fatty acid binding protein 7, brain                                               |
| E05 | NM_004104    | <b>FASN</b>   | Fatty acid synthase                                                               |
| E06 | NM_000159    | <b>GCDH</b>   | Glutaryl-CoA dehydrogenase                                                        |

|     |           |                |                                                                                                                  |
|-----|-----------|----------------|------------------------------------------------------------------------------------------------------------------|
| E07 | NM_000167 | <b>GK</b>      | Glycerol kinase                                                                                                  |
| E08 | NM_033214 | <b>GK2</b>     | Glycerol kinase 2                                                                                                |
| E09 | NM_005276 | <b>GPD1</b>    | Glycerol-3-phosphate dehydrogenase 1 (soluble)                                                                   |
| E10 | NM_000408 | <b>GPD2</b>    | Glycerol-3-phosphate dehydrogenase 2 (mitochondrial)                                                             |
| E11 | NM_000182 | <b>HADHA</b>   | Hydroxyacyl-CoA dehydrogenase/3-ketoacyl-CoA thiolase/enoyl-CoA hydratase (trifunctional protein), alpha subunit |
| E12 | NM_000191 | <b>HMGCL</b>   | 3-hydroxymethyl-3-methylglutaryl-CoA lyase                                                                       |
| F01 | NM_002130 | <b>HMGCS1</b>  | 3-hydroxy-3-methylglutaryl-CoA synthase 1 (soluble)                                                              |
| F02 | NM_005518 | <b>HMGCS2</b>  | 3-hydroxy-3-methylglutaryl-CoA synthase 2 (mitochondrial)                                                        |
| F03 | NM_005357 | <b>LIPE</b>    | Lipase, hormone-sensitive                                                                                        |
| F04 | NM_000237 | <b>LPL</b>     | Lipoprotein lipase                                                                                               |
| F05 | NM_032601 | <b>MCEE</b>    | Methylmalonyl CoA epimerase                                                                                      |
| F06 | NM_000255 | <b>MUT</b>     | Methylmalonyl CoA mutase                                                                                         |
| F07 | NM_022120 | <b>OXCT2</b>   | 3-oxoacid CoA transferase 2                                                                                      |
| F08 | NM_018441 | <b>PECR</b>    | Peroxisomal trans-2-enoyl-CoA reductase                                                                          |
| F09 | NM_021129 | <b>PPA1</b>    | Pyrophosphatase (inorganic) 1                                                                                    |
| F10 | NM_006251 | <b>PRKAA1</b>  | Protein kinase, AMP-activated, alpha 1 catalytic subunit                                                         |
| F11 | NM_006252 | <b>PRKAA2</b>  | Protein kinase, AMP-activated, alpha 2 catalytic subunit                                                         |
| F12 | NM_006253 | <b>PRKAB1</b>  | Protein kinase, AMP-activated, beta 1 non-catalytic subunit                                                      |
| G01 | NM_005399 | <b>PRKAB2</b>  | Protein kinase, AMP-activated, beta 2 non-catalytic subunit                                                      |
| G02 | NM_002730 | <b>PRKACA</b>  | Protein kinase, cAMP-dependent, catalytic, alpha                                                                 |
| G03 | NM_182948 | <b>PRKACB</b>  | Protein kinase, cAMP-dependent, catalytic, beta                                                                  |
| G04 | NM_002733 | <b>PRKAG1</b>  | Protein kinase, AMP-activated, gamma 1 non-catalytic subunit                                                     |
| G05 | NM_016203 | <b>PRKAG2</b>  | Protein kinase, AMP-activated, gamma 2 non-catalytic subunit                                                     |
| G06 | NM_017431 | <b>PRKAG3</b>  | Protein kinase, AMP-activated, gamma 3 non-catalytic subunit                                                     |
| G07 | NM_198580 | <b>SLC27A1</b> | Solute carrier family 27 (fatty acid transporter), member 1                                                      |
| G08 | NM_003645 | <b>SLC27A2</b> | Solute carrier family 27 (fatty acid transporter), member 2                                                      |
| G09 | NM_024330 | <b>SLC27A3</b> | Solute carrier family 27 (fatty acid transporter), member 3                                                      |

|     |           |                |                                                             |
|-----|-----------|----------------|-------------------------------------------------------------|
| G10 | NM_005094 | <b>SLC27A4</b> | Solute carrier family 27 (fatty acid transporter), member 4 |
| G11 | NM_012254 | <b>SLC27A5</b> | Solute carrier family 27 (fatty acid transporter), member 5 |
| G12 | NM_014031 | <b>SLC27A6</b> | Solute carrier family 27 (fatty acid transporter), member 6 |
| H01 | NM_001101 | <b>ACTB</b>    | Actin, beta                                                 |
| H02 | NM_004048 | <b>B2M</b>     | Beta-2-microglobulin                                        |
| H03 | NM_002046 | <b>GAPDH</b>   | Glyceraldehyde-3-phosphate dehydrogenase                    |
| H04 | NM_000194 | <b>HPRT1</b>   | Hypoxanthine phosphoribosyltransferase 1                    |
| H05 | NM_001002 | <b>RPLP0</b>   | Ribosomal protein, large, P0                                |
| H06 | SA_00105  | <b>HGDC</b>    | Human Genomic DNA Contamination                             |
| H07 | SA_00104  | <b>RTC</b>     | Reverse Transcription Control                               |
| H08 | SA_00104  | <b>RTC</b>     | Reverse Transcription Control                               |
| H09 | SA_00104  | <b>RTC</b>     | Reverse Transcription Control                               |
| H10 | SA_00103  | <b>PPC</b>     | Positive PCR Control                                        |
| H11 | SA_00103  | <b>PPC</b>     | Positive PCR Control                                        |
| H12 | SA_00103  | <b>PPC</b>     | Positive PCR Control                                        |

**Table S5.** List of CT values of genes involved in fatty acid metabolism that was uploaded on to the data analysis web portal at <http://www.qiagen.com/geneglobe>

| Position | Control Group | Control Group | Control Group | PG/V G Test Group 1 | PG/V G Test Group 1 | PG/V G Test Group 1 | PG/VG+ N Test Group 2 | PG/VG+ N Test Group 2 | PG/VG+ N Test Group 2 | PG/VG+N+ F Test Group 3 | PG/VG+N+ F Test Group 3 | PG/VG+N+ F Test Group 3 |
|----------|---------------|---------------|---------------|---------------------|---------------------|---------------------|-----------------------|-----------------------|-----------------------|-------------------------|-------------------------|-------------------------|
| A01      | 25.455        | 24.70         | 26.12         | 25.91               | 25.70               | 25.38               | 25.24                 | 25.12                 | 25.79                 | 25.82                   | 25.69                   | 25.68                   |
| A02      | 24.443        | 25.43         | 24.87         | 23.59               | 24.43               | 24.53               | 23.21                 | 23.33                 | 23.75                 | 23.45                   | 23.69                   | 24.34                   |
| A03      | 26.68         | 36.24         | 26.78         | 25.67               | 26.24               | 26.21               | 25.07                 | 24.84                 | 25.64                 | 25.71                   | 25.62                   | 25.53                   |
| A04      | 25.21         | 27.57         | 25.77         | 24.94               | 24.57               | 24.99               | 24.46                 | 24.63                 | 24.86                 | 24.84                   | 24.89                   | 25.20                   |
| A05      | 26.45         | 22.39         | 26.23         | 25.83               | 25.89               | 25.63               | 25.29                 | 25.33                 | 25.54                 | 25.71                   | 25.70                   | 25.79                   |
| A06      | 38.00         | 26.35         | 33.81         | 40                  | 33.85               | 36.47               | 30.53                 | 29.66                 | 29.64                 | 31.18                   | 30.24                   | 30.75                   |
| A07      | 40            | 35.86         | 38.31         | 34.61               | 35.86               | 32.92               | 28.13                 | 28.43                 | 28.71                 | 30.29                   | 31.16                   | 31.21                   |
| A08      | 27.35         | 27.25         | 26.89         | 26.83               | 27.25               | 26.57               | 26.28                 | 26.39                 | 26.51                 | 27.06                   | 27.12                   | 27.18                   |
| A09      | 27.27         | 26.50         | 26.78         | 26.31               | 26.50               | 25.87               | 25.71                 | 25.84                 | 25.70                 | 26.59                   | 26.46                   | 26.71                   |
| A10      | 22.31         | 22.24         | 22.35         | 22.54               | 22.24               | 21.60               | 20.92                 | 21.09                 | 21.73                 | 21.58                   | 22.23                   | 22.42                   |
| A11      | 25.74         | 24.72         | 25.65         | 25.09               | 24.72               | 24.94               | 23.77                 | 23.86                 | 25.11                 | 24.76                   | 25.12                   | 25.37                   |
| A12      | 26.31         | 25.62         | 26.35         | 25.28               | 25.62               | 25.02               | 24.75                 | 25.14                 | 25.25                 | 26.16                   | 25.21                   | 25.57                   |
| B01      | 32.18         | 23.13         | 31.57         | 31.27               | 31.13               | 31.29               | 31.20                 | 31.14                 | 31.20                 | 31.64                   | 30.71                   | 30.95                   |
| B02      | 30.62         | 36.61         | 31.78         | 32.62               | 30.61               | 31.23               | 30.42                 | 29.57                 | 30.63                 | 31.54                   | 32.28                   | 31.17                   |
| B03      | 34.80         | 32.33         | 35.21         | 39.10               | 34.33               | 34.29               | 34.38                 | 34.94                 | 33.89                 | 34.54                   | 34.07                   | 33.65                   |
| B04      | 27.04         | 26.73         | 26.93         | 25.17               | 25.43               | 25.45               | 26.15                 | 25.73                 | 25.78                 | 25.98                   | 26.31                   | 25.68                   |
| B05      | 27.12         | 24.91         | 27.29         | 25.94               | 26.91               | 27.08               | 26.00                 | 26.53                 | 26.54                 | 26.32                   | 26.42                   | 26.71                   |
| B06      | 26.21         | 31.34         | 26.52         | 24.96               | 25.34               | 25.40               | 24.26                 | 24.40                 | 25.14                 | 25.65                   | 25.59                   | 25.64                   |
| B07      | 26.27         | 25.67         | 26.44         | 25.18               | 25.67               | 25.23               | 24.86                 | 24.76                 | 25.00                 | 25.81                   | 25.71                   | 26.36                   |
| B08      | 31.36         | 31.43         | 30.87         | 30.72               | 31.43               | 30.47               | 29.37                 | 29.32                 | 30.21                 | 29.63                   | 31.45                   | 31.15                   |
| B09      | 27.56         | 27.19         | 27.76         | 27.34               | 27.19               | 26.94               | 26.93                 | 27.16                 | 26.68                 | 27.89                   | 27.44                   | 27.38                   |
| B10      | 30.81         | 31.54         | 31.26         | 29.84               | 31.54               | 30.21               | 28.17                 | 30.06                 | 29.93                 | 29.20                   | 30.97                   | 30.91                   |
| B11      | 27.33         | 27.52         | 28.02         | 27.79               | 27.52               | 27.75               | 28.29                 | 28.67                 | 28.59                 | 28.22                   | 28.94                   | 28.70                   |
| B12      | 25.64         | 24.51         | 25.52         | 26.10               | 24.51               | 24.44               | 25.17                 | 25.72                 | 22.94                 | 25.98                   | 24.35                   | 24.54                   |
| C01      | 25.35         | 23.74         | 26.25         | 26.12               | 26.74               | 25.46               | 24.14                 | 24.76                 | 23.95                 | 25.86                   | 25.55                   | 25.07                   |
| C02      | 23.00         | 30.74         | 24.13         | 23.78               | 23.74               | 23.45               | 22.30                 | 22.73                 | 23.41                 | 22.62                   | 23.66                   | 25.08                   |
| C03      | 28.60         | 28.10         | 28.51         | 31.34               | 29.10               | 28.96               | 28.52                 | 28.52                 | 28.49                 | 28.24                   | 28.11                   | 28.58                   |
| C04      | 37.39         | 35.16         | 35.92         | 33.68               | 34.16               | 33.97               | 33.80                 | 33.19                 | 32.97                 | 32.65                   | 30.94                   | 30.90                   |

|     |       |       |       |       |       |       |       |       |       |       |       |       |
|-----|-------|-------|-------|-------|-------|-------|-------|-------|-------|-------|-------|-------|
| C05 | 28.58 | 24.69 | 28.61 | 28.97 | 28.69 | 28.31 | 28.31 | 27.99 | 27.51 | 28.45 | 27.95 | 28.58 |
| C06 | 32.67 | 26.15 | 31.90 | 32.88 | 32.15 | 32.27 | 31.52 | 31.92 | 30.34 | 32.18 | 32.38 | 31.45 |
| C07 | 29.02 | 29.30 | 29.03 | 29.47 | 29.30 | 29.11 | 29.65 | 29.60 | 29.07 | 30.03 | 29.75 | 29.90 |
| C08 | 26.72 | 28.24 | 26.82 | 26.24 | 28.24 | 26.53 | 25.47 | 25.69 | 26.38 | 27.34 | 27.21 | 26.84 |
| C09 | 30.86 | 30.85 | 31.23 | 30.35 | 30.85 | 30.48 | 30.15 | 29.51 | 28.22 | 30.92 | 30.39 | 30.01 |
| C10 | 24.14 | 24.88 | 24.21 | 24.34 | 24.88 | 24.92 | 22.89 | 23.48 | 24.28 | 23.98 | 23.95 | 24.19 |
| C11 | 26.46 | 26.12 | 26.82 | 26.50 | 26.12 | 26.07 | 24.58 | 24.78 | 26.63 | 25.24 | 26.34 | 26.50 |
| C12 | 31.19 | 31.31 | 31.74 | 31.70 | 31.31 | 31.24 | 31.28 | 31.29 | 31.79 | 31.92 | 31.18 | 31.39 |
| D01 | 25.49 | 26.92 | 25.57 | 25.21 | 26.92 | 26.15 | 24.60 | 24.66 | 25.39 | 25.50 | 26.25 | 25.77 |
| D02 | 27.50 | 24.94 | 26.74 | 27.73 | 26.94 | 27.15 | 27.82 | 27.27 | 26.55 | 28.28 | 27.65 | 27.46 |
| D03 | 26.30 | 32.19 | 25.84 | 24.74 | 25.19 | 24.87 | 24.58 | 24.58 | 24.24 | 24.56 | 24.84 | 24.53 |
| D04 | 26.87 | 33.25 | 27.29 | 25.95 | 26.25 | 25.86 | 24.63 | 25.2  | 25.35 | 24.94 | 25.79 | 25.43 |
| D05 | 24.27 | 29.44 | 24.92 | 23.90 | 24.44 | 23.25 | 22.41 | 23.10 | 24.36 | 22.71 | 24.84 | 24.89 |
| D06 | 26.40 | 28.96 | 26.08 | 26.42 | 25.96 | 25.79 | 26.91 | 26.72 | 26.32 | 26.55 | 26.47 | 25.98 |
| D07 | 24.70 | 24.40 | 24.79 | 23.19 | 24.40 | 23.72 | 23.65 | 23.47 | 22.84 | 24.33 | 24.60 | 24.53 |
| D08 | 25.23 | 25.45 | 25.60 | 24.03 | 25.45 | 25.05 | 23.71 | 24.40 | 24.34 | 24.35 | 25.65 | 25.18 |
| D09 | 29.29 | 30.39 | 29.75 | 29.49 | 30.39 | 29.53 | 27.24 | 28.26 | 28.18 | 28.26 | 29.52 | 29.25 |
| D10 | 26.55 | 31.43 | 26.97 | 31.24 | 31.43 | 30.88 | 31.53 | 32.19 | 31.18 | 29.81 | 29.76 | 29.34 |
| D11 | 33.23 | 34.21 | 32.88 | 34.34 | 34.21 | 34.66 | 33.30 | 34.45 | 39.65 | 32.99 | 37.15 | 36.84 |
| D12 | 26.72 | 26.76 | 26.65 | 25.62 | 26.76 | 26.46 | 26.16 | 26.33 | 23.96 | 26.65 | 24.86 | 24.99 |
| E01 | 28.90 | 28.43 | 29.36 | 28.72 | 28.43 | 28.67 | 26.64 | 26.68 | 30.76 | 27.21 | 29.90 | 29.50 |
| E02 | 23.80 | 21.65 | 24.66 | 23.51 | 21.65 | 20.86 | 22.52 | 23.71 | 22.65 | 23.87 | 22.79 | 23.31 |
| E03 | 30.63 | 29.81 | 29.42 | 30.48 | 29.81 | 29.95 | 30.73 | 30.27 | 29.73 | 30.14 | 29.65 | 29.87 |
| E04 | 31.15 | 30.58 | 30.87 | 30.66 | 30.58 | 30.81 | 30.88 | 31.18 | 31.57 | 30.93 | 31.33 | 31.19 |
| E05 | 24.93 | 23.67 | 25.37 | 24.31 | 23.67 | 23.32 | 24.12 | 24.09 | 23.46 | 24.41 | 24.40 | 25.28 |
| E06 | 28.01 | 27.85 | 28.42 | 26.92 | 27.85 | 27.67 | 26.98 | 26.94 | 27.24 | 27.86 | 27.50 | 27.61 |
| E07 | 34.91 | 34.42 | 34.39 | 35.91 | 34.42 | 32.45 | 31.41 | 32.78 | 32.95 | 32.97 | 34.74 | 34.60 |
| E08 | 37.22 | 38.27 | 34.08 | 36.13 | 38.27 | 35.90 | 37.19 | 36.96 | 38.90 | 37.23 | 40    | 40    |
| E09 | 31.69 | 35.65 | 33.30 | 29.17 | 35.65 | 32.66 | 31.95 | 31.85 | 31.77 | 33.41 | 32.98 | 33.72 |
| E10 | 24.65 | 25.41 | 25.12 | 25.11 | 25.41 | 24.66 | 23.67 | 24.18 | 24.46 | 24.36 | 24.72 | 24.78 |
| E11 | 24.60 | 24.39 | 24.67 | 23.84 | 24.39 | 24.21 | 23.28 | 23.73 | 23.78 | 24.17 | 24.33 | 24.35 |
| E12 | 25.65 | 25.58 | 26.09 | 24.63 | 25.58 | 25.19 | 24.77 | 24.63 | 23.87 | 25.82 | 24.61 | 24.56 |
| F01 | 22.74 | 23.07 | 23.40 | 23.15 | 23.07 | 22.69 | 22.78 | 22.80 | 21.90 | 24.10 | 22.56 | 22.33 |
| F02 | 31.29 | 37.48 | 32.83 | 34.32 | 37.48 | 32.87 | 33.93 | 39.06 | 32.88 | 40    | 34.59 | 32.95 |
| F03 | 27.67 | 27.73 | 27.39 | 27.60 | 27.73 | 27.43 | 27.59 | 27.33 | 27.25 | 27.74 | 27.74 | 27.66 |
| F04 | 28.82 | 28.34 | 28.94 | 25.40 | 28.34 | 27.84 | 25.94 | 26.27 | 26.30 | 25.60 | 27.25 | 27.17 |

|     |       |       |       |       |       |       |       |       |       |       |       |        |
|-----|-------|-------|-------|-------|-------|-------|-------|-------|-------|-------|-------|--------|
| F05 | 28.00 | 27.52 | 28.24 | 27.52 | 27.52 | 27.18 | 26.05 | 26.52 | 26.53 | 26.41 | 27.47 | 27.57  |
| F06 | 26.04 | 26.37 | 26.72 | 25.95 | 26.37 | 25.94 | 24.96 | 25.31 | 25.51 | 25.02 | 25.64 | 26.22  |
| F07 | 30.48 | 30.67 | 29.12 | 29.74 | 30.67 | 29.58 | 28.59 | 28.44 | 29.25 | 29.23 | 29.42 | 30.28  |
| F08 | 28.72 | 27.95 | 28.81 | 26.36 | 27.95 | 27.10 | 26.15 | 26.40 | 27.03 | 27.23 | 27.29 | 27.40  |
| F09 | 23.92 | 24.18 | 24.39 | 22.94 | 24.18 | 23.58 | 22.42 | 23.06 | 22.99 | 23.36 | 23.81 | 23.58  |
| F10 | 25.09 | 25.39 | 25.65 | 24.71 | 25.39 | 23.96 | 23.24 | 23.77 | 23.97 | 24.41 | 24.35 | 24.56  |
| F11 | 28.49 | 30.09 | 29.92 | 27.47 | 30.09 | 28.71 | 27.56 | 28.34 | 28.08 | 28.54 | 29.33 | 28.91  |
| F12 | 27.95 | 28.12 | 28.48 | 25.70 | 28.12 | 27.43 | 26.22 | 26.78 | 25.66 | 27.14 | 26.99 | 26.96  |
| G01 | 26.45 | 27.10 | 27.46 | 26.66 | 27.10 | 27.14 | 25.61 | 26.20 | 25.39 | 25.87 | 26.00 | 26.20  |
| G02 | 26.19 | 27.00 | 27.36 | 26.64 | 27.00 | 26.42 | 25.01 | 25.38 | 24.51 | 25.20 | 25.78 | 25.60  |
| G03 | 26.70 | 25.88 | 26.08 | 24.79 | 25.88 | 25.79 | 24.62 | 24.93 | 24.72 | 24.70 | 25.17 | 24.86  |
| G04 | 25.00 | 24.77 | 25.69 | 24.14 | 24.77 | 24.77 | 23.54 | 23.45 | 24.21 | 23.59 | 24.69 | 24.19  |
| G05 | 27.61 | 27.37 | 27.62 | 26.18 | 27.37 | 27.10 | 25.87 | 26.39 | 25.95 | 26.42 | 26.56 | 26.98  |
| G06 | 32.70 | 33.50 | 31.90 | 33.58 | 33.50 | 31.60 | 37.20 | 34.93 | 28.48 | 33.06 | 29.17 | 30.71  |
| G07 | 28.39 | 28.21 | 28.16 | 27.42 | 28.21 | 27.75 | 27.50 | 27.64 | 26.91 | 28.42 | 27.85 | 28.51  |
| G08 | 33.38 | 34.21 | 32.91 | 32.37 | 34.21 | 32.46 | 32.49 | 32.63 | 29.28 | 32.52 | 33.60 | 32.28  |
| G09 | 28.50 | 28.88 | 28.97 | 27.31 | 28.88 | 28.08 | 27.85 | 27.51 | 27.08 | 28.44 | 28.29 | 28.07  |
| G10 | 29.39 | 29.21 | 29.94 | 27.71 | 29.21 | 28.17 | 27.71 | 27.62 | 27.89 | 29.36 | 29.22 | 28.81  |
| G11 | 28.11 | 27.69 | 27.75 | 28.07 | 27.69 | 27.41 | 28.32 | 28.24 | 27.94 | 28.55 | 27.59 | 27.87  |
| G12 | 28.99 | 31.94 | 29.81 | 30.11 | 31.94 | 29.10 | 26.79 | 27.63 | 28.52 | 29.25 | 29.53 | 29.21  |
| H01 | 19.61 | 19.82 | 20.21 | 18.52 | 19.82 | 18.97 | 18.95 | 18.88 | 17.82 | 19.50 | 19.18 | 18.97  |
| H02 | 19.64 | 20.37 | 20.91 | 20.00 | 20.37 | 19.77 | 17.83 | 18.73 | 19.77 | 18.20 | 19.52 | 20.07  |
| H03 | 20.97 | 19.78 | 20.17 | 19.61 | 19.78 | 19.19 | 20.01 | 19.23 | 17.95 | 20.16 | 20.12 | 19.39  |
| H04 | 26.00 | 25.64 | 26.24 | 24.58 | 25.64 | 25.95 | 24.65 | 24.40 | 24.94 | 24.77 | 25.75 | 25.35  |
| H05 | 20.42 | 19.06 | 20.44 | 18.15 | 19.06 | 18.37 | 18.23 | 17.30 | 17.63 | 17.80 | 18.91 | 18.96  |
| H06 | 35.81 | 36.13 | 35.70 | 36.98 | 36.13 | 34.09 | 38.56 | 33.56 | 36.59 | 34.50 | 35.38 | 35.69  |
| H07 | 21.89 | 23.77 | 23.15 | 21.52 | 23.77 | 23.15 | 24.99 | 22.83 | 22.82 | 23.57 | 22.54 | 24.70  |
| H08 | 21.52 | 23.80 | 23.74 | 22.38 | 23.80 | 23.10 | 22.09 | 21.68 | 23.44 | 22.32 | 24.29 | 24.91  |
| H09 | 20.87 | 24.34 | 23.44 | 20.48 | 24.34 | 23.17 | 20.62 | 21.13 | 23.24 | 21.19 | 23.09 | 23.90  |
| H10 | 28.09 | 29.83 | 28.24 | 27.31 | 29.83 | 28.69 | 26.78 | 27.74 | 28.05 | 28.14 | 28.86 | 28.56  |
| H11 | 27.68 | 28.87 | 29.02 | 27.21 | 28.87 | 27.76 | 26.82 | 28.89 | 28.11 | 28.13 | 28.78 | 28.57  |
| H12 | 27.96 | 29.08 | 28.18 | 27.46 | 29.08 | 29.16 | 26.52 | 27.79 | 26.73 | 27.91 | 28.55 | 28.554 |

**Table S6.** Fold regulation and p-Values of genes associated with fatty acid metabolism analyzed in the study. Fold Regulation (comparing to control group)

| Position | Gene Symbol | Group 1         |          | Group 2         |          | Group 3         |          |
|----------|-------------|-----------------|----------|-----------------|----------|-----------------|----------|
|          |             | Fold Regulation | p-Value  | Fold Regulation | p-Value  | Fold Regulation | p-Value  |
| A01      | ACAA1       | -2.01           | 0.048542 | -2.8            | 0.016388 | -2.21           | 0.027894 |
| A02      | ACAA2       | -1.03           | 0.776242 | -1.03           | 0.792344 | 1.18            | 0.714739 |
| A03      | ACAD10      | 6.4             | 0.6315   | 6.82            | 0.524766 | 8.11            | 0.318698 |
| A04      | ACAD11      | 1.5             | 0.70867  | 1               | 0.607066 | 1.29            | 0.974287 |
| A05      | ACAD9       | -2.88           | 0.344697 | -3.72           | 0.322925 | -2.93           | 0.342622 |
| A06      | ACADL       | -12.68          | 0.369737 | 1.18            | 0.416386 | 1.11            | 0.417011 |
| A07      | ACADM       | 1.04            | 0.708738 | 32.85           | 0.006002 | 9.59            | 0.000668 |
| A08      | ACADS       | -1.4            | 0.251221 | -1.7            | 0.134504 | -1.74           | 0.125277 |
| A09      | ACADSB      | -1.11           | 0.649403 | -1.35           | 0.168952 | -1.5            | 0.139147 |
| A10      | ACADVL      | -1.51           | 0.191533 | -1.39           | 0.257033 | -1.53           | 0.043931 |
| A11      | ACAT1       | -1.24           | 0.5143   | -1.33           | 0.557376 | -1.47           | 0.071616 |
| A12      | ACAT2       | 1.02            | 0.859647 | -1.4            | 0.137779 | -1.31           | 0.524461 |
| B01      | ACOT1       | -8.21           | 0.373023 | -13.43          | 0.371535 | -7.89           | 0.373397 |
| B02      | ACOT12      | 1.16            | 0.752789 | 1.66            | 0.866835 | -1.03           | 0.429374 |
| B03      | ACOT6       | -2.4            | 0.280458 | -3.71           | 0.201734 | -1.86           | 0.355934 |
| B04      | ACOT7       | 1.72            | 0.035566 | -1.43           | 0.045815 | 1.05            | 0.767286 |
| B05      | ACOT8       | -1.96           | 0.280723 | -2.73           | 0.203106 | -1.85           | 0.2926   |
| B06      | ACOT9       | 4.06            | 0.24632  | 3.71            | 0.354409 | 2.93            | 0.658994 |
| B07      | ACOX1       | -1              | 0.99261  | -1.22           | 0.111804 | -1.6            | 0.04958  |
| B08      | ACOX2       | -1.34           | 0.340069 | 1.04            | 0.927867 | -1.29           | 0.561817 |
| B09      | ACOX3       | -1.34           | 0.169607 | -1.94           | 0.000816 | -1.88           | 0.019001 |
| B10      | ACSBG1      | -1.07           | 0.796352 | 1.22            | 0.574991 | 1               | 0.941453 |
| B11      | ACSBG2      | -1.78           | 0.077905 | -5.38           | 0.003044 | -3.58           | 0.004257 |
| B12      | ACSL1       | -1.48           | 0.607042 | -1.89           | 0.535272 | -1.49           | 0.552809 |
| C01      | ACSL3       | -3.39           | 0.132828 | -1.63           | 0.318414 | -2.33           | 0.201804 |
| C02      | ACSL4       | 2.89            | 0.642993 | 3.05            | 0.750924 | 2.51            | 0.651126 |
| C03      | ACSL5       | -4.49           | 0.009226 | -3.12           | 0.000959 | -1.68           | 0.035302 |

|     |               |        |          |       |          |       |          |
|-----|---------------|--------|----------|-------|----------|-------|----------|
| C04 | <b>ACSL6</b>  | 1.22   | 0.250416 | 1.1   | 0.600237 | 6.3   | 0.073107 |
| C05 | <b>ACSM3</b>  | -4.38  | 0.312885 | -4.52 | 0.308799 | -3.68 | 0.325518 |
| C06 | <b>ACSM4</b>  | -7.8   | 0.359158 | -5.88 | 0.363639 | -6.1  | 0.362462 |
| C07 | <b>ACSM5</b>  | -1.93  | 0.074261 | -3.62 | 0.015483 | -3.07 | 0.022552 |
| C08 | <b>ALDH2</b>  | -1.43  | 0.374609 | -1.08 | 0.667734 | -1.64 | 0.252543 |
| C09 | <b>BDH1</b>   | -1.27  | 0.067749 | 1.12  | 0.609952 | -1.23 | 0.609427 |
| C10 | <b>BDH2</b>   | -2.1   | 0.088246 | -1.59 | 0.339097 | -1.39 | 0.282793 |
| C11 | <b>CPT1A</b>  | -1.45  | 0.160809 | -1.31 | 0.862862 | -1.32 | 0.160847 |
| C12 | <b>CPT1B</b>  | -1.71  | 0.08074  | -2.98 | 0.005024 | -1.9  | 0.062988 |
| D01 | <b>CPT1C</b>  | -1.82  | 0.207438 | -1.34 | 0.403861 | -1.61 | 0.227743 |
| D02 | <b>CPT2</b>   | -3.14  | 0.168202 | -5.11 | 0.11551  | -4.74 | 0.122737 |
| D03 | <b>CRAT</b>   | 5.33   | 0.288872 | 4.32  | 0.550669 | 6.17  | 0.172267 |
| D04 | <b>CROT</b>   | 5.09   | 0.292138 | 5.71  | 0.248712 | 7.48  | 0.053914 |
| D05 | <b>DECR1</b>  | 2.98   | 0.60495  | 2.62  | 0.662377 | 2.33  | 0.838443 |
| D06 | <b>DECR2</b>  | 1.25   | 0.818553 | -2.05 | 0.213949 | -1.02 | 0.532141 |
| D07 | <b>ECHS1</b>  | 1.07   | 0.550888 | -1.16 | 0.346152 | -1.62 | 0.005287 |
| D08 | <b>ECI2</b>   | -1.14  | 0.593853 | -1.2  | 0.594086 | -1.39 | 0.152046 |
| D09 | <b>EHHADH</b> | -1.7   | 0.162567 | 1.31  | 0.572161 | -1.03 | 0.754397 |
| D10 | <b>FABP1</b>  | -12.41 | 0.116284 | -28.9 | 0.11077  | -4.48 | 0.136404 |
| D11 | <b>FABP2</b>  | -3.32  | 0.103371 | -5.06 | 0.085761 | -3.32 | 0.11947  |
| D12 | <b>FABP3</b>  | -1.26  | 0.289409 | -1.24 | 0.975776 | 1.29  | 0.390821 |
| E01 | <b>FABP4</b>  | -1.39  | 0.235217 | -1.58 | 0.773429 | -1.76 | 0.452171 |
| E02 | <b>FABP5</b>  | 1.51   | 0.50594  | -2.18 | 0.301157 | -1.74 | 0.399356 |
| E03 | <b>FABP6</b>  | -1.86  | 0.250142 | -3.53 | 0.083747 | -1.71 | 0.262328 |
| E04 | <b>FABP7</b>  | -1.5   | 0.143765 | -3.67 | 0.004842 | -2.18 | 0.009357 |
| E05 | <b>FASN</b>   | 1.09   | 0.758268 | -1.7  | 0.152533 | -1.84 | 0.155805 |
| E06 | <b>GCDH</b>   | -1.12  | 0.364784 | -1.41 | 0.039111 | -1.33 | 0.223062 |
| E07 | <b>GK</b>     | -1.11  | 0.792326 | 1.58  | 0.368644 | -1.3  | 0.554187 |
| E08 | <b>GK2</b>    | -2.1   | 0.186509 | -3.57 | 0.09803  | -2.22 | 0.168222 |
| E09 | <b>GPD1</b>   | 1.22   | 0.595872 | -1.04 | 0.519851 | -1.84 | 0.319307 |
| E10 | <b>GPD2</b>   | -1.7   | 0.131449 | -1.48 | 0.283446 | -1.32 | 0.263873 |
| E11 | <b>HADHA</b>  | -1.28  | 0.069132 | -1.49 | 0.103464 | -1.49 | 0.027429 |
| E12 | <b>HMGCL</b>  | -1.09  | 0.373878 | -1.13 | 0.553173 | -1.05 | 0.794041 |



|     |                |       |          |       |          |       |          |
|-----|----------------|-------|----------|-------|----------|-------|----------|
| F01 | <b>HMGCS1</b>  | -1.59 | 0.112293 | -1.94 | 0.047888 | -1.7  | 0.362526 |
| F02 | <b>HMGCS2</b>  | -3.45 | 0.230846 | -5.37 | 0.195291 | -3.95 | 0.227631 |
| F03 | <b>LIPE</b>    | -1.69 | 0.119489 | -2.51 | 0.037891 | -1.94 | 0.078766 |
| F04 | <b>LPL</b>     | 1.67  | 0.369455 | 1.99  | 0.029435 | 2.27  | 0.094906 |
| F05 | <b>MCEE</b>    | -1.2  | 0.326859 | 1.01  | 0.827637 | -1.05 | 0.828492 |
| F06 | <b>MUT</b>     | -1.39 | 0.131583 | -1.33 | 0.30076  | -1.06 | 0.801114 |
| F07 | <b>OXCT2</b>   | -1.59 | 0.369865 | -1.15 | 0.616168 | -1.32 | 0.50045  |
| F08 | <b>PECR</b>    | 1.51  | 0.115709 | 1.36  | 0.267124 | 1.27  | 0.154291 |
| F09 | <b>PPA1</b>    | -1.13 | 0.492561 | -1.14 | 0.69016  | -1.2  | 0.252519 |
| F10 | <b>PRKAA1</b>  | -1.06 | 0.941731 | 1.13  | 0.603804 | 1.06  | 0.766058 |
| F11 | <b>PRKAA2</b>  | -1.02 | 0.943831 | -1.01 | 0.805619 | -1.21 | 0.505089 |
| F12 | <b>PRKAB1</b>  | 1.26  | 0.496432 | 1.35  | 0.255236 | 1.24  | 0.30915  |
| G01 | <b>PRKAB2</b>  | -1.67 | 0.147342 | -1.2  | 0.524918 | 1.1   | 0.82888  |
| G02 | <b>PRKACA</b>  | -1.52 | 0.238998 | 1.28  | 0.522283 | 1.39  | 0.318521 |
| G03 | <b>PRKACB</b>  | -1.02 | 0.887202 | -1.05 | 0.776717 | 1.38  | 0.152692 |
| G04 | <b>PRKAG1</b>  | -1.13 | 0.401189 | -1.08 | 0.846456 | 1.11  | 0.465316 |
| G05 | <b>PRKAG2</b>  | -1.09 | 0.663927 | -1.05 | 0.852306 | 1.03  | 0.838065 |
| G06 | <b>PRKAG3</b>  | -1.95 | 0.373751 | -3.1  | 0.710624 | 1.84  | 0.372498 |
| G07 | <b>SLC27A1</b> | -1.24 | 0.239276 | -1.55 | 0.105537 | -1.8  | 0.112541 |
| G08 | <b>SLC27A2</b> | -1.21 | 0.576657 | 1.42  | 0.51309  | -1.11 | 0.692374 |
| G09 | <b>SLC27A3</b> | -1.05 | 0.835354 | -1.17 | 0.40721  | -1.25 | 0.387841 |
| G10 | <b>SLC27A4</b> | 1.3   | 0.17472  | 1.18  | 0.21304  | -1.38 | 0.188936 |
| G11 | <b>SLC27A5</b> | -1.56 | 0.176814 | -3.6  | 0.008332 | -1.99 | 0.096795 |
| G12 | <b>SLC27A6</b> | -1.87 | 0.327645 | 2.1   | 0.434841 | 1.05  | 0.579324 |
| H01 | <b>ACTB</b>    | 1.01  | 0.988641 | -1.15 | 0.684315 | -1.13 | 0.692316 |
| H02 | <b>B2M</b>     | -1.42 | 0.292702 | -1    | 0.815027 | 1.15  | 0.712705 |
| H03 | <b>GAPDH</b>   | 1.01  | 0.952745 | -1.22 | 0.796888 | -1.34 | 0.41314  |
| H04 | <b>HPRT1</b>   | -1.15 | 0.67802  | -1.17 | 0.31048  | -1.12 | 0.193351 |
| H05 | <b>RPLP0</b>   | 1.61  | 0.071266 | 1.65  | 0.123996 | 1.49  | 0.20647  |

**Table S7.** Genes and primers used in the study.

| Gene                            | Forward (5'-3')           | Reverse (5'-3')            |
|---------------------------------|---------------------------|----------------------------|
| <b>TP63</b>                     | CACCATGTGAGCTCTTCCTATC    | AGGTAGCCTCTTACTTCTCCTT     |
| <b>Cytokeratin K14</b>          | AGTCCCTACTTCAAGACCATTGAG  | GGTCCAACCTCTGTCTCATACTTGG  |
| <b>Cytokeratin K13</b>          | TCAAGACACGTCTGGAGCAG      | AAGTCAGACAGTGAGGGGTCT      |
| <b>Beta-Actin</b>               | ACGTTGCTATCCAGGCTGTGCTAT  | CTCGGTGAGGATCTTCATGAGGTAGT |
| <b>CDH1</b>                     | CGATTAAGGTGGAGAGAGGACTG   | AATGAATGGTGGACAGACACAGG    |
| <b>MUC1</b>                     | AGACGTCAGCGTGAGTGATG      | GACAGCCAAGGCAATGAGAT       |
| <b>MUC4</b>                     | GGGAAGAAAGGCCCAACTAC      | CTATGCTGACGGGTTGGAAT       |
| <b>IL6</b>                      | AAGCCAGAGCTGTGCAGATGAGTA  | GCTGCGCAGAATGAGATGAGTTGT   |
| <b>IL8</b>                      | AGACATACTCCAAACCTTTCCACCC | TCCAGACAGAGCTCTCTTCCATCA   |
| <b>MMP2</b>                     | AGAAGGATGGCAAGTACGGCT     | AGTGGTGCAGCTGTCATAGGATGT   |
| <b>CTNNB1</b><br>(Beta-Catenin) | TCTGAGGACAAGCCACAAGATTACA | TGGGCACCAATATCAAGTCCAA     |
| <b>LEF1</b>                     | AATGAGAGCGAATGTCGTTGC     | GCTGTCTTTCTTTCCGTGCTA      |
| <b>Wnt2</b>                     | CTGACCTGATGCAGACGCAAG     | AGGAGCCACCTGTAGCTCTCATGTA  |
| <b>Wnt7b</b>                    | GTCAGGGATGTTTGTCCCACTTG   | TCTGGTAGGTCCTTGTGCCACTC    |
| <b>LAMA5</b>                    | CACCGCCCGGAAGGC           | CAGGTGACTGGACAGGGAAC       |
| <b>CyclinD1</b>                 | TCTACACCGACAACCTCCATCCG   | TCTGGCATTGAGAGGAAGTG       |
